## The “LINC” in between $\Delta 40p53$ -miRNA axis in the regulation of cellular processes

---

Apala Pal<sup>1</sup> and Saumitra Das<sup>1\*</sup>

1 <sup>1</sup>Department of Microbiology and Cell Biology, Indian Institute of Science,

2 Bangalore-560012, India.

3 \*Address for correspondence:

4 Dr. Saumitra Das, Professor,

5 Department of Microbiology and Cell Biology,

6 Indian Institute of Science, Bangalore-560012, India

7 Email: [sdas@iisc.ac.in](mailto:sdas@iisc.ac.in)

8 Phone: 91 80 2293 2886

9 Fax: 91 80 2360 2697

## 10 **ABSTRACT**

11 Recently, we showed that  $\Delta 40p53$ , the translational isoform of p53, can inhibit cell growth  
12 independently of p53 by regulating microRNAs. Here, we explored the role of  $\Delta 40p53$  in  
13 regulating the lncRNA-miRNA axis. Based on early research from our laboratory, we  
14 selected LINC00176 for further exploration. LINC00176 levels were affected by the  
15 overexpression and knockdown of  $\Delta 40p53$ . Further, under DNA damage, ER stress, and  
16 glucose deprivation, LINC00176 was upregulated in HCT116 p53<sup>-/-</sup> cells (harboring only  
17  $\Delta 40p53$ ) compared to HCT116 p53<sup>+/+</sup> cells. Additionally, ChIP and RNA stability assays  
18 revealed that  $\Delta 40p53$  transactivates LINC00176 transcriptionally and stabilizes it post-  
19 transcriptionally. We ectopically overexpressed and knocked down LINC00176 in HCT116  
20 p53<sup>-/-</sup> cells, which affected proliferation, cell viability, and the expression of epithelial  
21 markers. Finally, RNA pulldown revealed that LINC00176 sequesters several putative  
22 miRNA targets. These results provide important insights into the pivotal role of  $\Delta 40p53$  in  
23 regulating the lncRNA-miRNA axis.

24 **Keywords:** p53 isoform;  $\Delta 40p53$ ; LINC00176; miRNA; cellular effect of  $\Delta 40p53$

## 25 **INTRODUCTION**

26 The tumor suppressor p53 is a master transcriptional regulator that regulates several critical  
27 events during cell fate determination, including transcriptional regulation of multiple genes  
28 involved in cell survival, cell cycle regulation, apoptosis, and metabolism (1). p53 has 12  
29 isoforms created by alternate promoters, splicing sites, and translation initiation sites. These  
30 different isoforms have unique functions and are capable of modulating p53 activity (2). The  
31  $\Delta 40p53$  isoform is the only translational isoform of p53. Our laboratory has shown that  
32 translation initiation from the first IRES (Internal Ribosomal Entry Site) of *TP53* generates  
33 full-length p53 protein, whereas translation initiation from the second IRES generates  
34  $\Delta 40p53$  (3). Various ITAFs (IRES *trans* acting factors) are required for the IRES-mediated  
35 translation of the two isoforms under different stress conditions (4-6). We have also shown  
36 how a protein and miRNA crosstalk at the TP53 3'-UTR influences differential expression of  
37 p53 and  $\Delta 40p53$  (7).

38 These two isoforms have a robust affinity toward each other as both contain the  
39 oligomerization domain, and they can therefore form homo- and hetero-tetramers (8).  $\Delta 40p53$   
40 can both positively and negatively regulate p53 activity: it can alter the recruitment of p53

41 co-activators, increasing its activity (9), but it can negatively regulate the transactivation of  
42 p53 target genes, such as p21 (10).  $\Delta 40p53$  also has p53-independent functions. It controls  
43 the switch from pluripotency to differentiation in somatic cells and helps maintain  
44 pluripotency in embryonic stem cells (11). It also regulates proliferation and glucose  
45 homeostasis in mice (12). Moreover, it uniquely regulates genes involved in apoptosis (13)  
46 and senescence (14). In certain cancers, full-length p53 is insufficient to protect against  
47 tumorigenesis, and  $\Delta 40p53$  is essential for mediating apoptosis through the selective  
48 activation of specific target genes (15). Recent observations also suggest a role for  $\Delta 40p53$  as  
49 a tumor suppressor in hepatocellular carcinoma (16). One of our latest studies showed that  
50  $\Delta 40p53$  can specifically regulate miR-186-5p (17). However, although some studies have  
51 examined the functional role of  $\Delta 40p53$ , there has been little detailed investigation regarding  
52 intermediate molecules (such as RNAs or proteins) through which  $\Delta 40p53$  exerts its  
53 influence on cells.

54 Some RNAs in the p53 response pathway have been shown to be involved in tumor  
55 suppression (18). Among the cellular pool of RNAs, lncRNAs (long non-coding RNAs) have  
56 gained attention in cancer because of their transactivation functions. lncRNAs are a  
57 heterogeneous class of noncoding RNAs >200 nucleotides in length with very low or no  
58 coding potential. Several lncRNAs crosstalk with p53, thereby regulating cellular processes  
59 including cell proliferation, differentiation and development, chromosomal imprinting, and  
60 genomic stability (19-21). Therefore, we were interested in exploring the regulation of long  
61 noncoding RNAs by  $\Delta 40p53$ .

62 To understand the potential role of  $\Delta 40p53$ -mediated regulation of lncRNAs, we investigated  
63 a cellular lncRNA profile (unpublished observation) in our laboratory in H1299 cells (a p53-  
64 null cell line) with overexpression of full-length p53,  $\Delta 40p53$ , or both isoforms. Preliminary  
65 results suggested that several lncRNAs are differentially regulated under these conditions.  
66 Interestingly, LINC00176 was predominantly regulated by  $\Delta 40p53$ . LINC00176 is a long  
67 noncoding RNA that is differentially expressed in cancer and normal tissues and may have a  
68 tumor-suppressive role. Recent studies have demonstrated that LINC00176 regulates the  
69 expression of microRNAs in hepatocellular carcinoma (22) and that it promotes ovarian  
70 cancer progression by downregulating ceruloplasmin (23). By contrast, a report on genome-  
71 scale CRISPR screening has emphasized its possible role as a tumor suppressor lncRNA (24).  
72 LINC00176 is regulated through several pathways involving different upstream regulators  
73 and downstream targets. Based on the results obtained from our preliminary experiments, we  
74 decided to focus on LINC00176 and its differential regulation by p53 isoforms. We found

75 that LINC00176 is predominantly regulated by  $\Delta 40p53$ . Therefore, in this study, we explored  
76 the role of the  $\Delta 40p53/p53$ -LINC00176 axis in microRNA-mediated regulation of cell  
77 growth and proliferation.

## 78 MATERIALS AND METHODS

### 79 Bioinformatic Analysis

80 GEPIA (<http://gepia.cancer-pku.cn/detail.php?gene=LINC00176>) was used for analysing  
81 differential LINC00176 levels in cancer. LINC00176 was queried in the database and the  
82 results were generated by selecting Cancer versus Normal Analysis (25). starBase v2.0  
83 database (<https://starbase.sysu.edu.cn/starbase2/browseNcRNA.php>) was used to identify  
84 potential miRNA targets of LINC00176 (26). catRAPID fragments software was used to  
85 predict possible protein binding regions in LINC00176  
86 ([http://service.tartagliab.com/page/catrapid\\_group\\_old](http://service.tartagliab.com/page/catrapid_group_old)), and the interaction score between  
87 LINC00176 and the  $\Delta 40p53$  was predicted by RPISeq software  
88 (<http://pridb.gdcb.iastate.edu/RPISeq/results.php>). PROMOALGEN has been used to predict  
89 transcription factor binding site in *LINC00176* gene ([http://algggen.lsi.upc.es/cgi-  
90 bin/promo\\_v3/promo/promoinit.cgi?dirDB=TF\\_8.3](http://algggen.lsi.upc.es/cgi-bin/promo_v3/promo/promoinit.cgi?dirDB=TF_8.3)). dbDEMC2.0 has been used to perform  
91 a meta profiling of selected miRNAs (<https://www.biosino.org/dbDEMC/help#help00>) (27).

### 92 Cell lines and transfections

93 We have used three cell lines in the current study: H1299 (lung adenocarcinoma cell line  
94 lacking p53/ $\Delta 40p53$ ), HCT116 p53+/+ cells (colon carcinoma cell line harboring wild-type  
95 p53; hereafter called HCT116+/+); and HCT116 p53-/- cells (colon carcinoma cell line  
96 harboring only  $\Delta 40p53$ ; hereafter called HCT116-/-). These cells were maintained in DMEM  
97 (Sigma) with 10% Foetal Bovine Serum (GIBCO, Invitrogen). 70%-80% confluent  
98 monolayer of cells was transfected with various plasmid constructs using Lipofectamine 2000  
99 (Invitrogen) and Turbofectamine in Opti-MEM (Invitrogen). The medium was replaced with  
100 DMEM (with antibiotic) and 10% FBS four hours later. The cells were harvested and  
101 processed as required at the desired time point. For the stress-induced experiments, the cells  
102 were treated with doxorubicin (2 $\mu$ M) for 16 h, Thapsigargin (0.1  $\mu$ M, 1  $\mu$ M) for 16 h,  
103 DMEM minus Glucose medium for 8 h. For stability experiments cells were transfected with  
104 siRNA directed to  $\Delta 40p53$ , post 40 h of transfection cells were treated with Actinomycin D  
105 (1 mg/ml) and cells were harvested at 0 h, 4 h and 8 h post treatment.

## 106 **Plasmids and constructs**

107 pGFP-hp-p53- 5'UTR-cDNA (14A): It expresses both p53FL and  $\Delta$ 40p53 (a generous gift  
108 from Dr. Robin Fahraeus, INSERM, France). pGFP-hp-p53-5'UTR (A135T)-cDNA which  
109 expresses only  $\Delta$ 40p53 and pGFP-hp-p53- 5'UTR (A251G/T252 C/G253T)-cDNA which  
110 expresses only full-length p53(p53FL) (17). Two constructs were used for Tagged RNA  
111 Affinity Purification: Plasmid pMS2 and pMS2-GST. (Both the constructs were a generous  
112 gift from Je-Hyun Yoon and Myriam Gorospe Laboratory of Genetics and Genomics,  
113 National Institutes of Health, Baltimore, MD 21224, USA) (28,29). LINC00176 (3495–4302)  
114 construct obtained in the study (a generous gift from Dr. T Tamura Institut fuer Biochemie,  
115 Hannover, Germany) has been used to generate the overexpression construct. LINC00176  
116 overexpression construct was generated by cloning the insert into pMS2 plasmid between  
117 HindIII and EcoRI sites.  
118 5'CCGGTGTCTGCTTTGCAAACATTAATACTCGAGTTTAATGTTTGCAAGACGAC  
119 ATTTTTG-3' sequence of shRNA was used to target LINC00176.

## 120 **siRNA transfections**

121 HCT116+/+ and HCT116-/- cells were transfected with 30 nM si p53 RNA (IDT). 5'-  
122 AACCUUCUUGGUGAACCUUAGUACCU-3' is the sequence for p53 siRNA, directed  
123 against the 3'UTR of p53; therefore, it targets both p53 as well as  $\Delta$ 40p53. A non-specific  
124 siRNA (Dharmacon) was used in the partial silencing of p53/ $\Delta$ 40p53 in the experiments as  
125 control. si-LINC00176 (5'-CUCGUUCUGUAGACUUGUU-3') was used for partial silencing  
126 of LINC00176 (a generous gift from Dr. T Tamura, Institut fuer Biochemie, Hannover,  
127 Germany) (22).

## 128 **Western Blot analysis**

129 Protein concentrations of the extracts were assayed by Bradford (Bio-Rad) and equal amounts  
130 of cell extracts were separated by SDS 12% PAGE and transferred to nitrocellulose  
131 membrane (Bio-Rad). Samples were then analyzed by Western blotting using rabbit-raised  
132 anti-p53 polyclonal antibody (CM1, kind gift from Dr. Robin Fahraeus, INSERM, France and  
133 Prof. J.C. Bourdon, of University of Dundee, UK), followed by secondary antibody  
134 (horseradish peroxidase-conjugated anti-mouse or anti-rabbit IgG; Sigma). Mouse-  
135 monoclonal anti- $\beta$ -actin antibody (Sigma) was used as a control for equal loading of total cell  
136 extracts. 1801 antibody (Santa Cruz Biotechnology, Cat. No. SC-98) was used to detect p53  
137 and  $\Delta$ 40p53. E-cadherin antibody (Santa Cruz Biotechnology, Cat. No. SC-8426), Slug

138 antibody (Santa Cruz Biotechnology, Cat. No. SC-166476), Bip antibody (Abclonal, Cat. No.  
139 A4908) and GST Antibody (B-14) (Santa Cruz Biotechnology, Cat. No. SC-138) was used to  
140 detect E-cadherin, Slug, Bip and GST proteins respectively.

#### 141 **RNA isolation and Real time PCR**

142 Total RNA was isolated from cells with TRI Reagent™ (Sigma), according to  
143 manufacturer's protocol. The isolated RNA was treated with 10 units of DNase I (Promega),  
144 extracted with acidic phenol-chloroform, and precipitated with 3 M sodium acetate (pH 5.2)  
145 and 2.5 volumes of absolute alcohol. RNA amount was quantified with Nano-  
146 spectrophotometer and cDNAs were synthesized using specific reverse primers and MMLV  
147 RT (Revertaid™ Thermo Scientific) at 42°C for 1 h, according to standard protocol. While  
148 2-5µg of total RNA has been used for checking the expression of mRNAs and lncRNAs,  
149 50ng of total RNA has been used to check the expression of miRNAs.

150 SYBR green Assay System was used for mRNA, lncRNA and miRNA detection and  
151 quantification. We have used actin as endogenous control for mRNA, lncRNA and 5SrRNA  
152 as endogenous control for miRNAs. The thermocycling conditions for SYBR green Assay  
153 system include 1 cycle of 95°C for 10 min, and 40 cycles of 95°C for 15 s, and 60°C for 30 s  
154 and 72°C for 30 s (Applied Biosystems).  $2^{-\Delta\Delta Ct}$  method algorithm was used to analyse the  
155 relative changes in expressions, where actin/5S served as an endogenous control. The fold  
156 change was calculated using  $2^{-\Delta\Delta Ct}$ .  $\Delta Ct = Ct(\text{target gene}) - Ct(\text{endogenous control})$  and  
157  $\Delta\Delta Ct = \Delta Ct(\text{target sample}) - \Delta Ct(\text{control sample})$ . Melting curve analysis of every (q)PCR  
158 was conducted after each cycle.

#### 159 **Tagged RNA Affinity Pull down Assay (TRAP Assay)**

160 The method is based on the addition of MS2 RNA hairpin loops to a target RNA of interest,  
161 followed by co-expression of the MS2-tagged RNA together with the protein MS2 (which  
162 recognizes the MS2 RNA elements) fused to an affinity tag (29). After purification of the  
163 MS2 RNP complex, the miRNAs present in the complex are identified. In this study we have  
164 tagged the LINC00176 with MS2 hairpins and have co-expressed it in Human colon  
165 carcinoma cells (HCT116-/-) along with the chimeric protein MS2-GST (glutathione S-  
166 transferase). After affinity purification using glutathione SH beads, the microRNAs present in  
167 the RNP complex were identified by reverse transcription (RT) and real-time, quantitative  
168 (q)PCR.

169 **MTT Assay**

170 HCT116<sup>-/-</sup> cells were transfected with either LINC00176 o/e or sh-LINC00176 construct, 36  
171 h post transfection these cells were re-seeded in 96 well plate. After 20 h of reseeded 10 µl  
172 of MTT (50 mg/ml) reagent was added and cells were incubated for 3-4 h, following which  
173 the supernatant was removed and cells were dissolved in 200µl of DMSO. Cell viability was  
174 measured as a spectrophotometry reading of amount of MTT incorporated in the cell at 560  
175 nm wavelength. The reading taken on the first day is considered as Day 0. Similarly, the  
176 reading was measured on Day 2 and Day 4 and Day 6 post re-seeding to check the effect on  
177 cell viability over a period of time.

178 **Cell cycle Analysis**

179 HCT116<sup>-/-</sup> cells were transfected with either LINC00176 o/e or sh-LINC00176 construct, 48  
180 h post transfection the cells were harvested and fixed with methanol. The fixed cells were  
181 treated with RNase A (10 mg/ml) for 1 h at 37°C, following which PI (Propidium iodide-  
182 1mg/ml) was added to the cells and taken for Flow cytometric analysis.

183 **Colony formation Assay**

184 HCT116<sup>-/-</sup> cells were transfected with either LINC00176 o/e or sh-LINC00176 construct. 36  
185 h post transfection 1000 cells from each condition were reseeded on 6 well plate and was  
186 incubated for 10-14 days to observe the number of colonies obtained. Post 10-14 days, cells  
187 were harvested by directly adding methanol to the plates for cell fixation, followed by which  
188 the cells were stained with Crystal Violet solution. After the cells got stained, the excess  
189 colour was washed with water 2-3 times, following which the colonies were quantified for  
190 any differences in number.

191 **BrdU cell proliferation assay**

192 BrdU cell proliferation assay was performed as described in BrdU Cell Proliferation ELISA  
193 Kit (ab126556). Briefly, HCT116<sup>-/-</sup> cells were transfected with si-LINC00176. 36 h post  
194 transfection these cells were reseeded in 96 well plate. After 12 h of reseeded BrdU solution  
195 was added and cells were incubated for 12 h, followed by the protocol as mentioned in the  
196 manual.

## 197 **Statistical analysis**

198 The data were expressed as mean  $\pm$  SD. Statistical significance was determined using two-  
199 sided Student's t-test. The criterion for statistical significance was  $p \leq 0.05$  (\*) or  $p \leq 0.01$  (\*\*)  
200 or  $p \leq 0.001$  (\*\*\*)

## 201 **RESULTS**

### 202 **Selection and validation of LINC00176 for further studies**

203 We identified LINC00176 based on a preliminary screen (unpublished data from our  
204 laboratory) of lncRNA expression in cells expressing different p53 isoforms. As mentioned  
205 earlier, LINC00176 is known to have multiple regulators that govern important cancer-driven  
206 processes. We assessed the expression of LINC00176 using the GEPIA database.  
207 LINC00176 was differentially expressed in different cancer types (**Figure S1A**). Box plot  
208 analysis suggested that the expression of LINC00176 was lower in tumor tissues (lung and  
209 colon) than in normal tissues, which is analogous to WT p53 and  $\Delta 40p53$  levels in cancer  
210 (**Figure S1B**). To draw a direct association with p53, we assessed the correlation between  
211 p53 and LINC00176 expression and found that in normal tissues, LINC00176 was positively  
212 correlated with p53 levels (**Figure S1C, E, G**). However, in tumor tissues, they were  
213 negatively correlated (**Figure S1D, F, H**). This observation suggests that LINC00176 may be  
214 positively regulated by WT p53 in normal conditions and negatively regulated by mutant p53  
215 in tumor conditions. Since  $\Delta 40p53$  was not annotated in the GEPIA database, we could not  
216 analyze the correlation between  $\Delta 40p53$  and LINC00176. However, we hypothesize that  
217  $\Delta 40p53$  is one of the most important isoforms of p53 and could be a potential regulator of  
218 LINC00176.

219 Given the distinctive functions of LINC00176 reported in the literature, we investigated its  
220 regulation by p53 isoforms. To directly investigate the role of p53 isoforms on LINC00176,  
221 we examined the expression of LINC00176 in three cancer cell lines: H1299 cells with  
222 ectopic overexpression of p53,  $\Delta 40p53$ , or both (14A construct); HCT116+/+ and HCT116-/-  
223 cells. LINC00176 levels were first validated in H1299 cells after overexpressing p53,  
224  $\Delta 40p53$ , or both p53 and  $\Delta 40p53$ . It was upregulated under all conditions compared to  
225 control cells (**Figure 1A, B**). However, the fold change was highest in cells with  $\Delta 40p53$   
226 overexpression, suggesting that  $\Delta 40p53$  might be a more important regulator than p53. Since  
227 it would be more physiologically relevant to examine LINC00176 in a cell line with  
228 endogenous expression of p53, we also examined the levels of LINC00176 in HCT116+/+



229 and HCT116<sup>-/-</sup> cells. Interestingly, we found that the levels of LINC00176 were much higher  
230 in HCT116<sup>-/-</sup> cells than in HCT116<sup>+/+</sup> cells (**Figure 1C, D**). To confirm the ability of p53 to  
231 regulate LINC00176, an siRNA targeting to the 3'-UTR of *TP53* was transfected into  
232 HCT116<sup>+/+</sup> and HCT116<sup>-/-</sup> cells (**Figure 1F, H**). The levels of LINC00176 decreased in  
233 both cell lines after siRNA transfection (**Figure 1E, G**). However, we did not observe a  
234 significant decrease in LINC00176 in either cell line, which may be because p53/ $\Delta$ 40p53 are  
235 not the only regulators of LINC00176. Nevertheless, silencing  $\Delta$ 40p53 in HCT116<sup>-/-</sup> cells  
236 (**Figure 1G**) led to a greater reduction in LINC00176 levels than silencing p53 in  
237 HCT116<sup>+/+</sup> cells (**Figure 1E**). To further examine whether both isoforms could modulate the  
238 levels of LINC00176, p53 was overexpressed in HCT116<sup>-/-</sup> cells (**Figure 1J**), which reduced  
239 LINC00176 levels similar to those of 14A construct (expressing both p53 and  $\Delta$ 40p53)  
240 observed earlier (**Figure 1I**). These preliminary results suggest that LINC00176 is regulated  
241 by both p53 translational isoforms, but the levels differ with respect to isoform abundance.  
242 When p53 or  $\Delta$ 40p53 is present alone, either protein can upregulate LINC00176; however,  
243 there is higher expression of LINC00176 when only  $\Delta$ 40p53 is present.

#### 244 **Regulation of LINC00176 under different stress conditions**

245 p53 and  $\Delta$ 40p53 are translated by an IRES-mediated mechanism under stress conditions, such  
246 as DNA damage, ER stress, and glucose starvation (4-6). Cells were treated with doxorubicin  
247 and thapsigargin for 16 h to induce DNA damage and ER stress, respectively, and cultured in  
248 glucose-deprived DMEM for 8 h to induce glucose starvation (**Figure 2A**). In HCT116<sup>-/-</sup>  
249 cells,  $\Delta$ 40p53 levels increased under all stress conditions (**Figure 2C, E, G**). LINC00176  
250 levels also increased, with the highest increase observed in cells treated with thapsigargin  
251 (**Figure 2B, D, F**). In HCT116<sup>+/+</sup> cells, LINC00176 was upregulated in the doxorubicin-  
252 treated and glucose-deprived cells; however, in cells treated with thapsigargin, there was no  
253 significant change (**Figure S2 A-F**). It is unclear whether p53 or  $\Delta$ 40p53 was responsible for  
254 the increase in LINC00176 in HCT116<sup>+/+</sup> cells as both were found increased upon induction  
255 of stress. However, in line with our earlier observation of dominant regulation of LINC00176  
256 by  $\Delta$ 40p53, the results in HCT116<sup>-/-</sup> cells were more significant and consistent.

257 Next, we wanted to confirm whether  $\Delta$ 40p53 alone was involved in regulating LINC00176  
258 levels under stress or whether another factor could also regulate LINC00176. We selected ER  
259 stress as it maximally induced  $\Delta$ 40p53 in this model, and we observed significant  
260 upregulation of LINC00176 in cells treated with thapsigargin (**Figure 2D**). We knocked  
261 down  $\Delta$ 40p53 in HCT116<sup>-/-</sup> cells, followed by induction of ER stress (**Figure 2H**).

262 Compared to control cells that were untreated and not transfected with si $\Delta$ 40p53, there was  
263 no change in LINC00176 levels in the cells transfected with si $\Delta$ 40p53 and treated with  
264 thapsigargin (**Figure 2I-K**), indicating that  $\Delta$ 40p53 is a major regulator of LINC00176.  
265 These results suggest that the expression of LINC00176 is closely linked to  $\Delta$ 40p53 levels.  
266 However, we cannot exclude the possibility that other factors might also be involved in  
267 regulating LINC00176 expression.

### 268 **Mechanism of LINC00176 regulation by $\Delta$ 40p53/p53**

269 Next, we investigated whether LINC00176 is directly regulated by  $\Delta$ 40p53/p53 (**Figure 3A**).  
270 Using PROMO ALGGEN, we found that there are several  $\Delta$ 40p53/p53 binding sites in the  
271 *LINC00176* gene, which suggests that  $\Delta$ 40p53/p53 may regulate LINC00176 at the  
272 transcriptional level. An earlier study on LINC00176 revealed that it has three putative  
273 promoter regions in different cell types (22,24). We used ChIP experiments to examine the  
274 association of  $\Delta$ 40p53/p53 with these three probable promoter regions, one located at the  
275 proximal region of LINC00176 exon 1 (62665399–62666196) and two located at the  
276 proximal region of E2 (62667411–62667655 and 62667984–62668233). We  
277 immunoprecipitated HCT116<sup>-/-</sup> and HCT116<sup>+/+</sup> crosslinked lysates with 1801 antibody  
278 which can detect both  $\Delta$ 40p53 and p53 proteins (**Figure S3A, B**). The results showed an  
279 association between  $\Delta$ 40p53 and the *LINC00176* promoters in HCT116<sup>-/-</sup> cells. However, no  
280 such association was found for p53 in HCT116<sup>+/+</sup> cells (**Figure 3B, C**). Because we  
281 observed a decrease in LINC00176 levels upon p53 overexpression in HCT116<sup>-/-</sup> cells, we  
282 also examined the effect of ectopic p53 on the binding of  $\Delta$ 40p53 to *LINC00176* promoters in  
283 HCT116<sup>-/-</sup> cells. Interestingly, we found that the binding of  $\Delta$ 40p53 to all three *LINC00176*  
284 promoters decreased with p53 overexpression in HCT116<sup>-/-</sup> cells (**Figure 3D, E**). This  
285 observation is in accordance with the reported literature that p53 and  $\Delta$ 40p53 regulate each  
286 other's activity through the formation of hetero-oligomers (4). Hence, these results strengthen  
287 the observation that  $\Delta$ 40p53 controls LINC00176 regulation more than p53.

288 We also wanted to further assess the ability of  $\Delta$ 40p53/p53 to directly regulate LINC00176  
289 at the RNA level. p53 is known to directly affect certain RNAs through its C-terminal domain  
290 (30) which is shared with  $\Delta$ 40p53. We aimed to determine whether  $\Delta$ 40p53 could regulate  
291 LINC00176 RNA directly or indirectly. Analysis using CATRAPID and RPI-Seq software  
292 was used to identify potential interactions between mature LINC00176 and  $\Delta$ 40p53 (**Figure**  
293 **S3 C-F**). Both the databases predicted probable binding regions and positive interaction score  
294 for LINC00176 and the p53/ $\Delta$ 40p53. Because the protein domains of  $\Delta$ 40p53, which might

295 bind to LINC00176, are common with p53, we cannot exclude the possibility that there could  
296 be an interaction between LINC00176 and p53. However, based on our initial results, we  
297 focused on the  $\Delta 40p53$ -LINC00176 interaction. Based on the probable RNA binding, we  
298 treated cells with actinomycin D after transfection with si $\Delta 40p53$  to assess LINC00176  
299 stability (**Figure 3F**). The results indicate that knockdown of  $\Delta 40p53$  decreased LINC00176  
300 levels after treatment with actinomycin D, indicating that the stability of LINC00176 is  
301 increased by  $\Delta 40p53$  (**Figure 3G, H**). Therefore, the increased LINC00176 levels observed  
302 in the presence of  $\Delta 40p53$  in comparison to p53 could be due to multistep regulation at both  
303 the transcriptional and RNA stability levels.

#### 304 **Deciphering the mechanism of action of LINC00176**

305 Thus far, the results obtained in this study indicate that  $\Delta 40p53$  can regulate long noncoding  
306 RNAs in addition to miRNAs (17). Therefore, it is important to understand how LINC00176  
307 functions in cells and what its mechanism of action could be (**Figure 4A**). Long noncoding  
308 RNAs are known to interact with miRNAs, acting as a decoy or promoting their degradation,  
309 thereby impacting cellular processes (31). Therefore, miRNA-interacting partners of  
310 LINC00176 were predicted using the Starbase V.2.0 database (**Figure 4B**), and their levels  
311 were measured in HCT116<sup>+/+</sup> and HCT116<sup>-/-</sup> cells (**Figure 4C**). The expressions of these  
312 miRNAs (miR-761, miR-184, miR-503-5p, miR-15b-5p, miR-138, and miR-9-5p) varied.  
313 Since most had lower expression in HCT116<sup>-/-</sup> cells than in HCT116<sup>+/+</sup> cells, they could be  
314 possible targets of LINC00176, as LINC00176 levels are very high in HCT116<sup>-/-</sup> cells. In  
315 particular, miR-9-5p, which is a known target of LINC00176, was downregulated in  
316 HCT116<sup>-/-</sup> cells compared to HCT116<sup>+/+</sup> cells. To assess the direct effect of LINC00176 on  
317 these miRNAs, LINC00176 was silenced in HCT116<sup>-/-</sup> cells, and the corresponding changes  
318 in miRNA levels were assessed. Upon silencing LINC00176, the levels of LINC00176 were  
319 reduced by 60% compared to that in control cells (**Figure 4D**). The levels of the miRNAs  
320 increased from 30% to 80% (**Figure 4E**).

321 To investigate whether LINC00176 sequesters target miRNAs, tagged RNA affinity  
322 pulldown assays were performed (**Figure 4G**). miRNA levels were quantified in the  
323 pulldown fraction and normalized to input levels (**Figure 4F**). miR-184, miR-138, miR-503,  
324 miR-15b-5p, and miR-9-5p were significantly enriched in the pulldown fraction, indicating  
325 that they are direct targets of LINC00176. However, miR-761 did not show any enrichment  
326 in the pulldown fraction, implying that it might have an indirect interaction with LINC00176

327 or could be degraded in a complex. These results indicate that LINC00176 is capable of  
328 titrating miRNA levels in cells, which may affect cellular processes.

### 329 **The impact of the $\Delta 40p53$ -LINC00176 axis on cellular behavior**

330 lncRNAs regulate a wide variety of cellular processes (32). To understand the effect of  
331 LINC00176 on cellular behavior, we overexpressed or knocked down LINC00176 in  
332 HCT116<sup>-/-</sup> cells and examined the effects (**Figure 5A-C**). First, we examined the effect of  
333 LINC00176 on EMT marker expression. LINC00176 overexpression increased the levels of  
334 E-cadherin (epithelial marker) and decreased the levels of Slug and vimentin (mesenchymal  
335 markers) (**Figure 5D, E**). Interestingly, LINC00176 overexpression also increased  $\Delta 40p53$   
336 levels. By contrast, knocked down LINC00176 decreased the mRNA levels of E-cadherin but  
337 increased those of vimentin and Slug (**Figure 5F**); however, we did not observe the same  
338 trend for the protein levels of E-cadherin and Slug (**Figure S5A**). We further analyzed cell  
339 viability after LINC00176 overexpression or knockdown and observed that LINC00176  
340 overexpression decreased cell viability (**Figure 5G, S5 B, C**), whereas LINC00176  
341 knockdown increased cell viability (**Figure 5H, S5 D, E**). However, these effects on cell  
342 viability may not be very significant, because LINC00176 might contribute to only a small  
343 percentage of the vast majority of cellular processes. We also found that LINC00176  
344 knockdown increased proliferation using the BrdU assay (**Figure 5I**).  $\Delta 40p53$  abundance is  
345 closely linked with cell cycle phases (3); therefore, we also assessed the effect of LINC00176  
346 on cell cycle progression. We observed a slight increase in the proportion of cells in G1 phase  
347 and a slight decrease in the proportion of cells in S phase with LINC00176 overexpression  
348 (**Figure S5F**). Furthermore, to check for any effect on cell growth, we performed a colony  
349 formation assay, wherein we found a decrease in the number of colonies after LINC00176  
350 overexpression (**Figure S5G**) and an increase in the number of colonies after LINC00176  
351 knockdown (**Figure S5H**). Together, these results indicate that LINC00176 promotes the  
352 epithelial phenotype and suppresses the mesenchymal phenotype, cell growth, viability, and  
353 proliferation, all of which suggest that this lncRNA contributes to tumor suppression in cells.

## 354 **DISCUSSION**

355 In cancer, lncRNAs are key players in the p53-dependent transcriptional pathway, wherein  
356 lncRNAs and p53 can regulate each other (33). Therefore, to identify important cancer  
357 signaling pathways, it is extremely important to identify novel lncRNAs that are regulated  
358 through the p53 pathway. *TP53* is the most frequently mutated gene in human cancer (34);

359 however, these mutations are not found in all cancers, indicating that there could be other  
360 factors interfering with WT p53 function (35). These factors, which have complicated our  
361 understanding of p53 signaling, include more recently discovered p53 isoforms (36). Owing  
362 to the lack of detailed functional characterization, little information is available regarding p53  
363 isoforms. However, one isoform that has recently gained attention in cancer research is  
364  $\Delta 40p53$ , the only translational isoform of p53 (37). Although a few reports have shown the  
365 transactivation capacity of  $\Delta 40p53$ , there are no studies on the regulation of lncRNAs by  
366  $\Delta 40p53$ . We selected LINC00176 for our current study because of its variable regulation by  
367 different transcription factors and differential expression in cancer.

368 Significant changes in the levels of LINC00176 were observed in H1299 cells expressing  
369 p53,  $\Delta 40p53$ , and both isoforms. However, the maximum upregulation was observed in cells  
370 expressing only  $\Delta 40p53$ . The upregulation of LINC00176 by  $\Delta 40p53$  was also observed in  
371 other cell lines expressing only  $\Delta 40p53$  (HCT116<sup>-/-</sup>) as compared to cells expressing both  
372 isoforms (HCT116<sup>+/+</sup>). Furthermore, LINC00176 was upregulated under different stress  
373 conditions, and its expression correlated with the abundance of  $\Delta 40p53$ . However, we cannot  
374 rule out the possibility that there could be other factors involved in the regulation of  
375 LINC00176 because of certain observations. First, we did not observe a significant decrease  
376 in LINC00176 levels upon knockdown of  $\Delta 40p53$ . Second, upon induction of ER stress in  
377 cells with  $\Delta 40p53$  knockdown, LINC00176 levels did not change with respect to control  
378 cells. This indicates that although  $\Delta 40p53$  could be a major regulator of LINC00176, there  
379 are other factors that regulate LINC00176 abundance. This regulation could be at the  
380 transcriptional or processing stages; therefore, we investigated any direct binding between the  
381 molecules.

382  $\Delta 40p53$  was previously thought to be devoid of transactivation capacity because it lacks  
383 TAD1 (38); however, subsequent studies reported that it can regulate some p53 target genes  
384 (13,39). It has also been reported that  $\Delta 40p53$  is sufficient to induce cell death independent of  
385 p53 through a specific subset of genes (Fas, Dr5, Api1, and Pig3) (15). More recently, a study  
386 suggested an FLp53-independent, pro-tumoral role for  $\Delta 40p53$  because of its ability to  
387 transactivate the transcription of antiapoptotic proteins, such as netrin-1 (40). Therefore, we  
388 examined the association of  $\Delta 40p53$  and p53 with LINC00176. We observed binding of  
389  $\Delta 40p53$  to *LINC00176* promoters; surprisingly, p53 did not bind to *LINC00176* promoters.  
390 However, overexpression of p53 in HCT116<sup>-/-</sup> cells decreased the association of  $\Delta 40p53$   
391 with *LINC00176* promoters, suggesting that the formation of hetero-oligomers between p53  
392 and  $\Delta 40p53$  interfered with the transactivation function of  $\Delta 40p53$ , which is consistent with

393 the results of earlier reports (8). We also observed that  $\Delta 40p53$  regulates LINC00176 not  
394 only at the transcriptional level but also post-transcriptionally, since the stability of  
395 LINC00176 also decreased after  $\Delta 40p53$  knockdown. p53 is known to bind to the lncRNA  
396 MEG3 (28); however, there are no previous reports of  $\Delta 40p53$  binding to RNA. Whether  
397  $\Delta 40p53$  can directly or indirectly bind to LINC00176 RNA remains unknown and requires  
398 further investigation. Although we also observed LINC00176 upregulation with p53  
399 expression, it is possible that p53 might regulate it through an unrelated mechanism.

400 The significance of LINC00176 upregulation by  $\Delta 40p53$  was determined by examining  
401 different miRNA targets. We identified different miRNA targets for LINC00176, from which  
402 we selected a few targets based on the number of binding sites and their functions in different  
403 cancers (**Figure S4**). The majority of the selected miRNAs are differentially expressed in  
404 cancer owing to their diverse regulatory pathways. Their levels were mostly decreased in  
405 HCT116<sup>-/-</sup> cells compared to those in HCT116<sup>+/+</sup> cells, and their expressions negatively  
406 correlated with LINC00176 levels. Upon further analyzing their levels after knockdown of  
407 LINC00176 and TRAP assays, we found that most of these miRNAs were sequestered by  
408 LINC00176. However, although the level of miR-761 increased upon LINC00176  
409 knockdown, it was not sequestered by LINC00176. As lncRNAs are known to serve as  
410 miRNA decoys, LINC00176 may be degrading these miRNAs; however, the mechanism of  
411 miRNA regulation by LINC00176 needs to be further examined.

412 Finally, we examined the direct effects of LINC00176 on cellular behavior through ectopic  
413 overexpression or silencing. Based on the different hallmark processes of cancer (41) we  
414 examined EMT, cell proliferation, cell viability, cell cycle progression, and colony formation.  
415 LINC00176 overexpression enhanced the epithelial phenotype and upregulated  $\Delta 40p53$ ,  
416 suggesting a possible feed-forward loop between  $\Delta 40p53$  and LINC00176 through which  
417 they regulate the other's levels. However, LINC00176 knockdown did not give consistent  
418 results, as the expression of EMT markers also decreased upon LINC00176 knockdown. We  
419 speculate that the decrease in the protein levels of EMT markers could be due to a decrease in  
420  $\Delta 40p53$ , which might also directly regulate EMT markers. Therefore, the effect of  
421 LINC00176 knockdown is inconclusive.  $\Delta 40p53$  function is known to be cell context-  
422 specific, and  $\Delta 40p53$  can have differential effects when overexpressed or silenced (35). This  
423 strengthens our hypothesis that, since there is a feed-forward loop between LINC00176 and  
424  $\Delta 40p53$ , many of the lncRNA effects will be dependent on the levels of  $\Delta 40p53$  and therefore  
425 will vary. Furthermore, we observed a decrease in cell viability and colony formation and a  
426 slight decrease in the proportion of cells in S phase with LINC00176 overexpression.

427 In conclusion, our results indicated that LINC00176 contributes to the tumor-suppressive  
428 function of  $\Delta 40p53$ , independent of p53FL function (**Graphical Abstract**). However, it  
429 would be interesting to determine whether the function of the  $\Delta 40p53$ -LINC00176 axis is  
430 universal or cell type-specific. Taken together, this study opens up avenues for mechanistic  
431 insights into how  $\Delta 40p53$  governs cellular processes through lncRNAs.

## 432 **ACKNOWLEDGEMENTS**

433 We are grateful to Prof. J.C. Bourdon, University of Dundee, UK and Dr. Robin Fahraeus,  
434 INSERM, France, for providing us the anti-p53 antibody. We would like to thank Dr. Je-  
435 Hyun Yoon and Dr. Myriam Gorospe, National Institutes of Health, USA, for providing us  
436 with the TRAP constructs. We are grateful to Dr. T Tamura, Institut fuer Biochemie,  
437 Germany, for providing us with LINC00176 overexpression construct and siRNA. We would  
438 like to thank Prof. Sathees C. Raghavan for his valuable suggestions. We also thank the  
439 present and past SD lab-members for helpful discussion of the work. This work is supported  
440 by a research grant to SD from the Department of Biotechnology (DBT), Govt. of India. SD  
441 also acknowledges J.C. Bose fellowship for research support. This study was also supported  
442 by the DBT-IISc partnership program. DST Fund for Improvement of Science and  
443 Technology Infrastructure (FIST) level II infrastructure and University Grants Commission  
444 Centre of Advanced Studies support is acknowledged. We would like to thank Editage  
445 ([www.editage.com](http://www.editage.com)) for English language editing.

## 446 **AUTHOR CONTRIBUTIONS**

447 AP and SD: Conception and design of studies, analysis and interpretation, and writing the  
448 article. AP for performing the experiments.

## 449 **CONFLICT OF INTEREST**

450 The authors declare no conflict of interest.

## 451 REFERENCE

- 452 1. Somasundaram, K. (2000) Tumor suppressor p53: regulation and function. *Front Biosci*, **5**,  
453 D424-437.
- 454 2. Bourdon, J.C., Fernandes, K., Murray-Zmijewski, F., Liu, G., Diot, A., Xirodimas, D.P., Saville,  
455 M.K. and Lane, D.P. (2005) p53 isoforms can regulate p53 transcriptional activity. *Genes Dev*,  
456 **19**, 2122-2137.
- 457 3. Ray, P.S., Grover, R. and Das, S. (2006) Two internal ribosome entry sites mediate the  
458 translation of p53 isoforms. *EMBO Rep*, **7**, 404-410.
- 459 4. Grover, R., Ray, P.S. and Das, S. (2008) Polypyrimidine tract binding protein regulates IRES-  
460 mediated translation of p53 isoforms. *Cell Cycle*, **7**, 2189-2198.
- 461 5. Khan, D., Katoch, A., Das, A., Sharathchandra, A., Lal, R., Roy, P., Das, S., Chattopadhyay, S.  
462 and Das, S. (2015) Reversible induction of translational isoforms of p53 in glucose  
463 deprivation. *Cell Death Differ*, **22**, 1203-1218.
- 464 6. Sharathchandra, A., Lal, R., Khan, D. and Das, S. (2012) Annexin A2 and PSF proteins interact  
465 with p53 IRES and regulate translation of p53 mRNA. *RNA Biol*, **9**, 1429-1439.
- 466 7. Katoch, A., George, B., Iyyappan, A., Khan, D. and Das, S. (2017) Interplay between PTB and  
467 miR-1285 at the p53 3'UTR modulates the levels of p53 and its isoform Delta40p53alpha.  
468 *Nucleic Acids Res*, **45**, 10206-10217.
- 469 8. Ghosh, A., Stewart, D. and Matlashewski, G. (2004) Regulation of human p53 activity and cell  
470 localization by alternative splicing. *Mol Cell Biol*, **24**, 7987-7997.
- 471 9. Candeias, M.M., Malbert-Colas, L., Powell, D.J., Daskalogianni, C., Maslon, M.M., Naski, N.,  
472 Bourougaa, K., Calvo, F. and Fahraeus, R. (2008) P53 mRNA controls p53 activity by  
473 managing Mdm2 functions. *Nat Cell Biol*, **10**, 1098-1105.
- 474 10. Powell, D.J., Hrstka, R., Candeias, M., Bourougaa, K., Vojtesek, B. and Fahraeus, R. (2008)  
475 Stress-dependent changes in the properties of p53 complexes by the alternative translation  
476 product p53/47. *Cell Cycle*, **7**, 950-959.
- 477 11. Ungewitter, E. and Scoble, H. (2010) Delta40p53 controls the switch from pluripotency to  
478 differentiation by regulating IGF signaling in ESCs. *Genes Dev*, **24**, 2408-2419.
- 479 12. Hinault, C., Kawamori, D., Liew, C.W., Maier, B., Hu, J., Keller, S.R., Mirmira, R.G., Scoble, H.  
480 and Kulkarni, R.N. (2011) Delta40 Isoform of p53 controls beta-cell proliferation and glucose  
481 homeostasis in mice. *Diabetes*, **60**, 1210-1222.
- 482 13. Ohki, R., Kawase, T., Ohta, T., Ichikawa, H. and Taya, Y. (2007) Dissecting functional roles of  
483 p53 N-terminal transactivation domains by microarray expression analysis. *Cancer Sci*, **98**,  
484 189-200.
- 485 14. Maier, B., Gluba, W., Bernier, B., Turner, T., Mohammad, K., Guise, T., Sutherland, A.,  
486 Thorner, M. and Scoble, H. (2004) Modulation of mammalian life span by the short isoform  
487 of p53. *Genes Dev*, **18**, 306-319.
- 488 15. Phang, B.H., Othman, R., Bougeard, G., Chia, R.H., Frebourg, T., Tang, C.L., Cheah, P.Y. and  
489 Sabapathy, K. (2015) Amino-terminal p53 mutations lead to expression of apoptosis  
490 proficient p47 and prognosticate better survival, but predispose to tumorigenesis. *Proc Natl  
491 Acad Sci U S A*, **112**, E6349-6358.
- 492 16. Ota, A., Nakao, H., Sawada, Y., Karnan, S., Wahiduzzaman, M., Inoue, T., Kobayashi, Y.,  
493 Yamamoto, T., Ishii, N., Ohashi, T. *et al.* (2017) Delta40p53alpha suppresses tumor cell  
494 proliferation and induces cellular senescence in hepatocellular carcinoma cells. *J Cell Sci*,  
495 **130**, 614-625.
- 496 17. Katoch, A., Tripathi, S.K., Pal, A. and Das, S. (2021) Regulation of miR-186-YY1 axis by the p53  
497 translational isoform 40p53: implications in cell proliferation. *Cell Cycle*, **20**, 561-574.
- 498 18. Hunten, S., Kaller, M., Drepper, F., Oeljeklaus, S., Bonfert, T., Erhard, F., Dueck, A., Eichner,  
499 N., Friedel, C.C., Meister, G. *et al.* (2015) p53-Regulated Networks of Protein, mRNA, miRNA,  
500 and lncRNA Expression Revealed by Integrated Pulsed Stable Isotope Labeling With Amino  
501 Acids in Cell Culture (pSILAC) and Next Generation Sequencing (NGS) Analyses. *Mol Cell  
502 Proteomics*, **14**, 2609-2629.



- 503 19. Paralkar, V.R. and Weiss, M.J. (2013) Long noncoding RNAs in biology and hematopoiesis.  
504 *Blood*, **121**, 4842-4846.
- 505 20. Knoll, M., Lodish, H.F. and Sun, L. (2015) Long non-coding RNAs as regulators of the  
506 endocrine system. *Nat Rev Endocrinol*, **11**, 151-160.
- 507 21. Chaudhary, R. and Lal, A. (2017) Long noncoding RNAs in the p53 network. *Wiley Interdiscip*  
508 *Rev RNA*, **8**.
- 509 22. Tran, D.D.H., Kessler, C., Niehus, S.E., Mahnkopf, M., Koch, A. and Tamura, T. (2018) Myc  
510 target gene, long intergenic noncoding RNA, Linc00176 in hepatocellular carcinoma  
511 regulates cell cycle and cell survival by titrating tumor suppressor microRNAs. *Oncogene*, **37**,  
512 75-85.
- 513 23. Dai, L., Niu, J. and Feng, Y. (2020) Knockdown of long non-coding RNA LINC00176 suppresses  
514 ovarian cancer progression by BCL3-mediated down-regulation of ceruloplasmin. *J Cell Mol*  
515 *Med*, **24**, 202-213.
- 516 24. Zhu, S., Li, W., Liu, J., Chen, C.H., Liao, Q., Xu, P., Xu, H., Xiao, T., Cao, Z., Peng, J. *et al.* (2016)  
517 Genome-scale deletion screening of human long non-coding RNAs using a paired-guide RNA  
518 CRISPR-Cas9 library. *Nat Biotechnol*, **34**, 1279-1286.
- 519 25. Tang, Z., Li, C., Kang, B., Gao, G., Li, C. and Zhang, Z. (2017) GEPIA: a web server for cancer  
520 and normal gene expression profiling and interactive analyses. *Nucleic Acids Res*, **45**, W98-  
521 W102.
- 522 26. Li, J.H., Liu, S., Zhou, H., Qu, L.H. and Yang, J.H. (2014) starBase v2.0: decoding miRNA-  
523 ceRNA, miRNA-ncRNA and protein-RNA interaction networks from large-scale CLIP-Seq data.  
524 *Nucleic Acids Res*, **42**, D92-97.
- 525 27. Yang, Z., Wu, L., Wang, A., Tang, W., Zhao, Y., Zhao, H. and Teschendorff, A.E. (2017)  
526 dbDEMOC 2.0: updated database of differentially expressed miRNAs in human cancers.  
527 *Nucleic Acids Res*, **45**, D812-D818.
- 528 28. Yoon, J.H. and Gorospe, M. (2016) Identification of mRNA-Interacting Factors by MS2-TRAP  
529 (MS2-Tagged RNA Affinity Purification). *Methods Mol Biol*, **1421**, 15-22.
- 530 29. Yoon, J.H., Srikantan, S. and Gorospe, M. (2012) MS2-TRAP (MS2-tagged RNA affinity  
531 purification): tagging RNA to identify associated miRNAs. *Methods*, **58**, 81-87.
- 532 30. Zhu, J., Liu, S., Ye, F., Shen, Y., Tie, Y., Zhu, J., Wei, L., Jin, Y., Fu, H., Wu, Y. *et al.* (2015) Long  
533 Noncoding RNA MEG3 Interacts with p53 Protein and Regulates Partial p53 Target Genes in  
534 Hepatoma Cells. *PLoS One*, **10**, e0139790.
- 535 31. Yoon, J.H., Abdelmohsen, K. and Gorospe, M. (2014) Functional interactions among  
536 microRNAs and long noncoding RNAs. *Semin Cell Dev Biol*, **34**, 9-14.
- 537 32. Statello, L., Guo, C.J., Chen, L.L. and Huarte, M. (2021) Gene regulation by long non-coding  
538 RNAs and its biological functions. *Nat Rev Mol Cell Biol*, **22**, 96-118.
- 539 33. Lin, T., Hou, P.F., Meng, S., Chen, F., Jiang, T., Li, M.L., Shi, M.L., Liu, J.J., Zheng, J.N. and Bai, J.  
540 (2019) Emerging Roles of p53 Related lncRNAs in Cancer Progression: A Systematic Review.  
541 *Int J Biol Sci*, **15**, 1287-1298.
- 542 34. Goldstein, I., Marcel, V., Olivier, M., Oren, M., Rotter, V. and Hainaut, P. (2011)  
543 Understanding wild-type and mutant p53 activities in human cancer: new landmarks on the  
544 way to targeted therapies. *Cancer Gene Ther*, **18**, 2-11.
- 545 35. Zhang, X., Groen, K., Morten, B.C., Steffens Reinhardt, L., Campbell, H.G., Braithwaite, A.W.,  
546 Bourdon, J.C. and Avery-Kiejda, K.A. (2022) Effect of p53 and its N-terminally truncated  
547 isoform, Delta40p53, on breast cancer migration and invasion. *Mol Oncol*, **16**, 447-465.
- 548 36. Vieler, M. and Sanyal, S. (2018) p53 Isoforms and Their Implications in Cancer. *Cancers*  
549 *(Basel)*, **10**.
- 550 37. Steffens Reinhardt, L., Zhang, X., Wawruszak, A., Groen, K., De Iuliis, G.N. and Avery-Kiejda,  
551 K.A. (2020) Good Cop, Bad Cop: Defining the Roles of Delta40p53 in Cancer and Aging.  
552 *Cancers (Basel)*, **12**.
- 553 38. Courtois, S., Verhaegh, G., North, S., Luciani, M.G., Lassus, P., Hibner, U., Oren, M. and  
554 Hainaut, P. (2002) DeltaN-p53, a natural isoform of p53 lacking the first transactivation  
555 domain, counteracts growth suppression by wild-type p53. *Oncogene*, **21**, 6722-6728.

- 556 39. Yin, Y., Stephen, C.W., Luciani, M.G. and Fahraeus, R. (2002) p53 Stability and activity is  
557 regulated by Mdm2-mediated induction of alternative p53 translation products. *Nat Cell*  
558 *Biol*, **4**, 462-467.
- 559 40. Sun, Y., Manceau, A., Frydman, L., Cappuccio, L., Neves, D., Basso, V., Wang, H., Fombonne,  
560 J., Maise, C., Mehlen, P. *et al.* (2021) Delta40p53 isoform up-regulates netrin-1/UNC5B  
561 expression and potentiates netrin-1 pro-oncogenic activity. *Proc Natl Acad Sci U S A*, **118**.
- 562 41. Hanahan, D. and Weinberg, R.A. (2011) Hallmarks of cancer: the next generation. *Cell*, **144**,  
563 646-674.

## 564 **FIGURE LEGENDS**

### 565 **Figure 1. Selection and validation of LINC00176 for further studies**

566 (A) Quantitative PCR for validation of LINC00176 in H1299 cells expressing control, p53  
567 only,  $\Delta 40p53$  only and 14A construct. (B) Western blot analysis of cell extracts from H1299  
568 cells expressing control, p53 only,  $\Delta 40p53$  only and 14A construct, probed with CM1 after  
569 48 h. (C) Quantitative PCR for validations of LINC00176 in HCT116<sup>+/+</sup> and HCT116<sup>-/-</sup>  
570 cells. (D) Western blot analysis of cell extracts from HCT116<sup>+/+</sup> and HCT116<sup>-/-</sup>-cells, probed  
571 with CM1. (E) Quantitative PCR of LINC00176 in HCT116<sup>+/+</sup> cells transfected with si p53  
572 (30nM) and non-specific si (Nsp si). (F) Western blot analysis of cell extracts from  
573 HCT116<sup>+/+</sup> cells transfected with either si p53 (30nM) and non-specific si (Nsp si), probed  
574 with CM1. (G) Quantitative PCR of LINC00176 in HCT116<sup>-/-</sup> cells transfected with si  
575  $\Delta 40p53$  (30nM) and non-specific si (Nsp si). (H) Western blot analysis of cell extracts from  
576 HCT116<sup>-/-</sup> cells transfected with si $\Delta 40p53$  (30nM) and non-specific si (Nsp si), probed with  
577 CM1. (I) Quantitative PCR of LINC00176 in HCT116<sup>-/-</sup> cells transfected with control and  
578 p53 only. (J) Western blot analysis of cell extracts from HCT116<sup>-/-</sup> cells transfected with  
579 control and p53 only, probed with CM1.

### 580 **Figure 2. Regulation of LINC00176 under different stress conditions**

581 (A) Schematic of different stress induction in HCT116<sup>-/-</sup> cells. (B) Quantitative PCR of  
582 LINC00176 in HCT116<sup>-/-</sup> treated with Doxorubicin (2 $\mu$ M) for 16 h. (C) Western blot  
583 analysis of cell extracts from HCT116<sup>-/-</sup> treated with Doxorubicin (2 $\mu$ M) for 16 h, probed  
584 with CM1. (D) Quantitative PCR of LINC00176 in HCT116<sup>-/-</sup> treated with Thapsigargin  
585 (0.1 $\mu$ M and 1 $\mu$ M) for 16 h. (E) Western blot analysis of cell extracts from HCT116<sup>-/-</sup> treated  
586 with Thapsigargin (0.1 $\mu$ M and 1 $\mu$ M) for 16 h, probed with CM1. (F) Quantitative PCR of  
587 LINC00176 in HCT116<sup>-/-</sup> deprived of Glucose in medium for 8 h. (G) Western blot analysis  
588 of cell extracts from HCT116<sup>-/-</sup> deprived of Glucose in medium for 8 h, probed with CM1.  
589 (H) Schematic of experiment in HCT116<sup>-/-</sup> transfected with si $\Delta 40p53$  followed by  
590 Thapsigargin (0.1 $\mu$ M) treatment. (I) Quantitative PCR of LINC00176 in HCT116<sup>-/-</sup>  
591 transfected with si $\Delta 40p53$  followed by Thapsigargin (0.1 $\mu$ M) treatment. (J) Western blot  
592 analysis of cell extracts from HCT116<sup>-/-</sup> transfected with si $\Delta 40p53$  followed by Thapsigargin  
593 (0.1 $\mu$ M) treatment, probed with CM1. (K) Western blot analysis of cell extracts from  
594 HCT116<sup>-/-</sup> transfected with si $\Delta 40p53$  followed by Thapsigargin (0.1 $\mu$ M) treatment, probed  
595 with Bip Antibody.

596 **Figure 3. Mechanistic basis of LINC00176 regulation by  $\Delta 40p53/p53$**

597 (A) Schematic of possible routes of LINC00176 regulation. (B) Quantitative PCR of  
598 LINC00176 promoters in HCT116<sup>-/-</sup> cells processed for ChIP Assay 48 h post seeding.  
599  $\Delta 40p53$  was pulled down with 1801 Ab (Santa Cruz) and associated LINC00176 promoters  
600 were probed using qPCR. (C) Quantitative PCR of LINC00176 promoters in HCT116<sup>+/+</sup>  
601 cells processed for ChIP Assay 48 h post seeding. p53 was pulled down with 1801 Ab (Santa  
602 Cruz) and associated LINC00176 promoters were probed using qPCR. (D) Quantitative PCR  
603 of LINC00176 promoters in HCT116<sup>-/-</sup> cells transfected with p53 only and control, which  
604 has been processed for ChIP Assay 48 h post transfection.  $\Delta 40p53/p53$  was pulled down with  
605 1801 Ab (Santa Cruz) and associated LINC00176 promoters were probed using qPCR. (E)  
606 Western blot analysis of cell extracts from HCT116<sup>-/-</sup> transfected with p53 only and control,  
607 probed with CM1. (F) Schematic of experiment to determine  $\Delta 40p53$  mediated regulation on  
608 LINC00176 RNA stability. (G) Quantitative PCR of LINC00176 in HCT116<sup>-/-</sup> transfected  
609 with si $\Delta 40p53$  followed by Actinomycin D treatment for 0 h, 4 h and 8 h. (H) Western blot  
610 analysis of cell extracts from HCT116<sup>-/-</sup> transfected with si $\Delta 40p53$  followed by Actinomycin  
611 D treatment, probed with CM1.

612 **Figure 4. Deciphering the mechanism of action of LINC00176**

613 (A) Schematic for the probable downstream regulation by LINC00176. (B) Table for the  
614 selected miRNA targets of LINC00176 obtained from Starbase V2.0, as mentioned in  
615 methods section. (C) Quantitative PCR of selected miRNAs in HCT116<sup>+/+</sup> and HCT116<sup>-/-</sup>  
616 cells. (D) Quantitative PCR of LINC00176 in HCT116<sup>-/-</sup> transfected with siRNA (30nM)  
617 directed to LINC00176 and non-specific si (Nsp si). (E) Quantitative PCR of selected  
618 miRNAs in HCT116<sup>-/-</sup> cells transfected with siRNA (30nM) directed to LINC00176 and non-  
619 specific si (Nsp si). (F) Quantitative PCR of selected miRNAs in GST pulldown lysates of  
620 HCT116<sup>-/-</sup> cells (co-transfected with LINC00176 overexpression construct and pMS2-GST  
621 construct) normalised to Input values. (G) Western blot analysis of cell extracts from Input  
622 and Pulldown fraction of HCT116<sup>-/-</sup> cells (co-transfected with LINC00176 overexpression  
623 construct and pMS2-GST construct), probed with CM1 and GST Antibody.

624 **Figure 5: The impact of  $\Delta 40p53$ -LINC00176 axis on cellular processes**

625 (A) Schematic of the different processes that has been checked for any probable effect by  
626 LINC00176 over-expression or partial silencing. (B) Quantitative PCR of LINC00176 in  
627 HCT116<sup>-/-</sup> cells transfected with LINC00176 overexpression construct. (C) Quantitative

628 PCR of LINC00176 in HCT116<sup>-/-</sup> cells transfected with LINC00176 shRNA construct. (D)  
629 Quantitative PCR of EMT markers (E-cadherin, Vimentin, Slug) in HCT116<sup>-/-</sup> cells  
630 transfected with LINC00176 overexpression construct. (E) Western blot analysis of cell  
631 extracts from HCT116<sup>-/-</sup> cells transfected with LINC00176 overexpression construct, probed  
632 with E-cadherin Antibody, Slug Antibody and CM1. (F) Quantitative PCR of EMT markers  
633 (E-cadherin, Vimentin, Slug) in HCT116<sup>-/-</sup> cells transfected with LINC00176 shRNA  
634 construct. (G) HCT116<sup>-/-</sup> cells were transfected with LINC00176 overexpression construct,  
635 at 36 h post transfection cells were reseeded on 96 well plate for MTT Assay. MTT  
636 incorporation was calculated at Day 0, Day 2, Day 4 and Day 6 post seeding (Data  
637 represented for Set 1). (H) HCT116<sup>-/-</sup> cells were transfected with LINC00176 shRNA  
638 construct, at 36 h post transfection cells were reseeded on 96 well plate for MTT Assay. MTT  
639 incorporation was calculated at Day 0, Day 2, Day 4 and Day 6 post seeding (Data  
640 represented for Set 1). (I) HCT116<sup>-/-</sup> cells were transfected with 30nM si-LINC00176, 36 h  
641 post transfection cells were reseeded for BrdU assay. After 12 h of seeding BrdU was added  
642 to the cells and incubated for 12 h. Following which, percentage of cell proliferation was  
643 checked by calculating BrdU incorporation.

644 **Graphical Abstract: Model depicting the regulation of  $\Delta$ 40p53-LINC00176-miRNA**  
645 **axis**

646 (A) In absence of  $\Delta$ 40p53, LINC00176 levels do not increase which leads to increased pool  
647 of free miRNAs which probably binds to several mRNA targets preventing their function,  
648 ultimately resulting in increased cell proliferation. (B) However, when  $\Delta$ 40p53 is present it  
649 upregulates LINC00176 levels both at the level of transcription and post-transcription, which  
650 sequesters oncogenic miRNAs preventing it to bind to their respective mRNA targets, which  
651 ultimately results in decreased cell proliferation.

Figure: 1

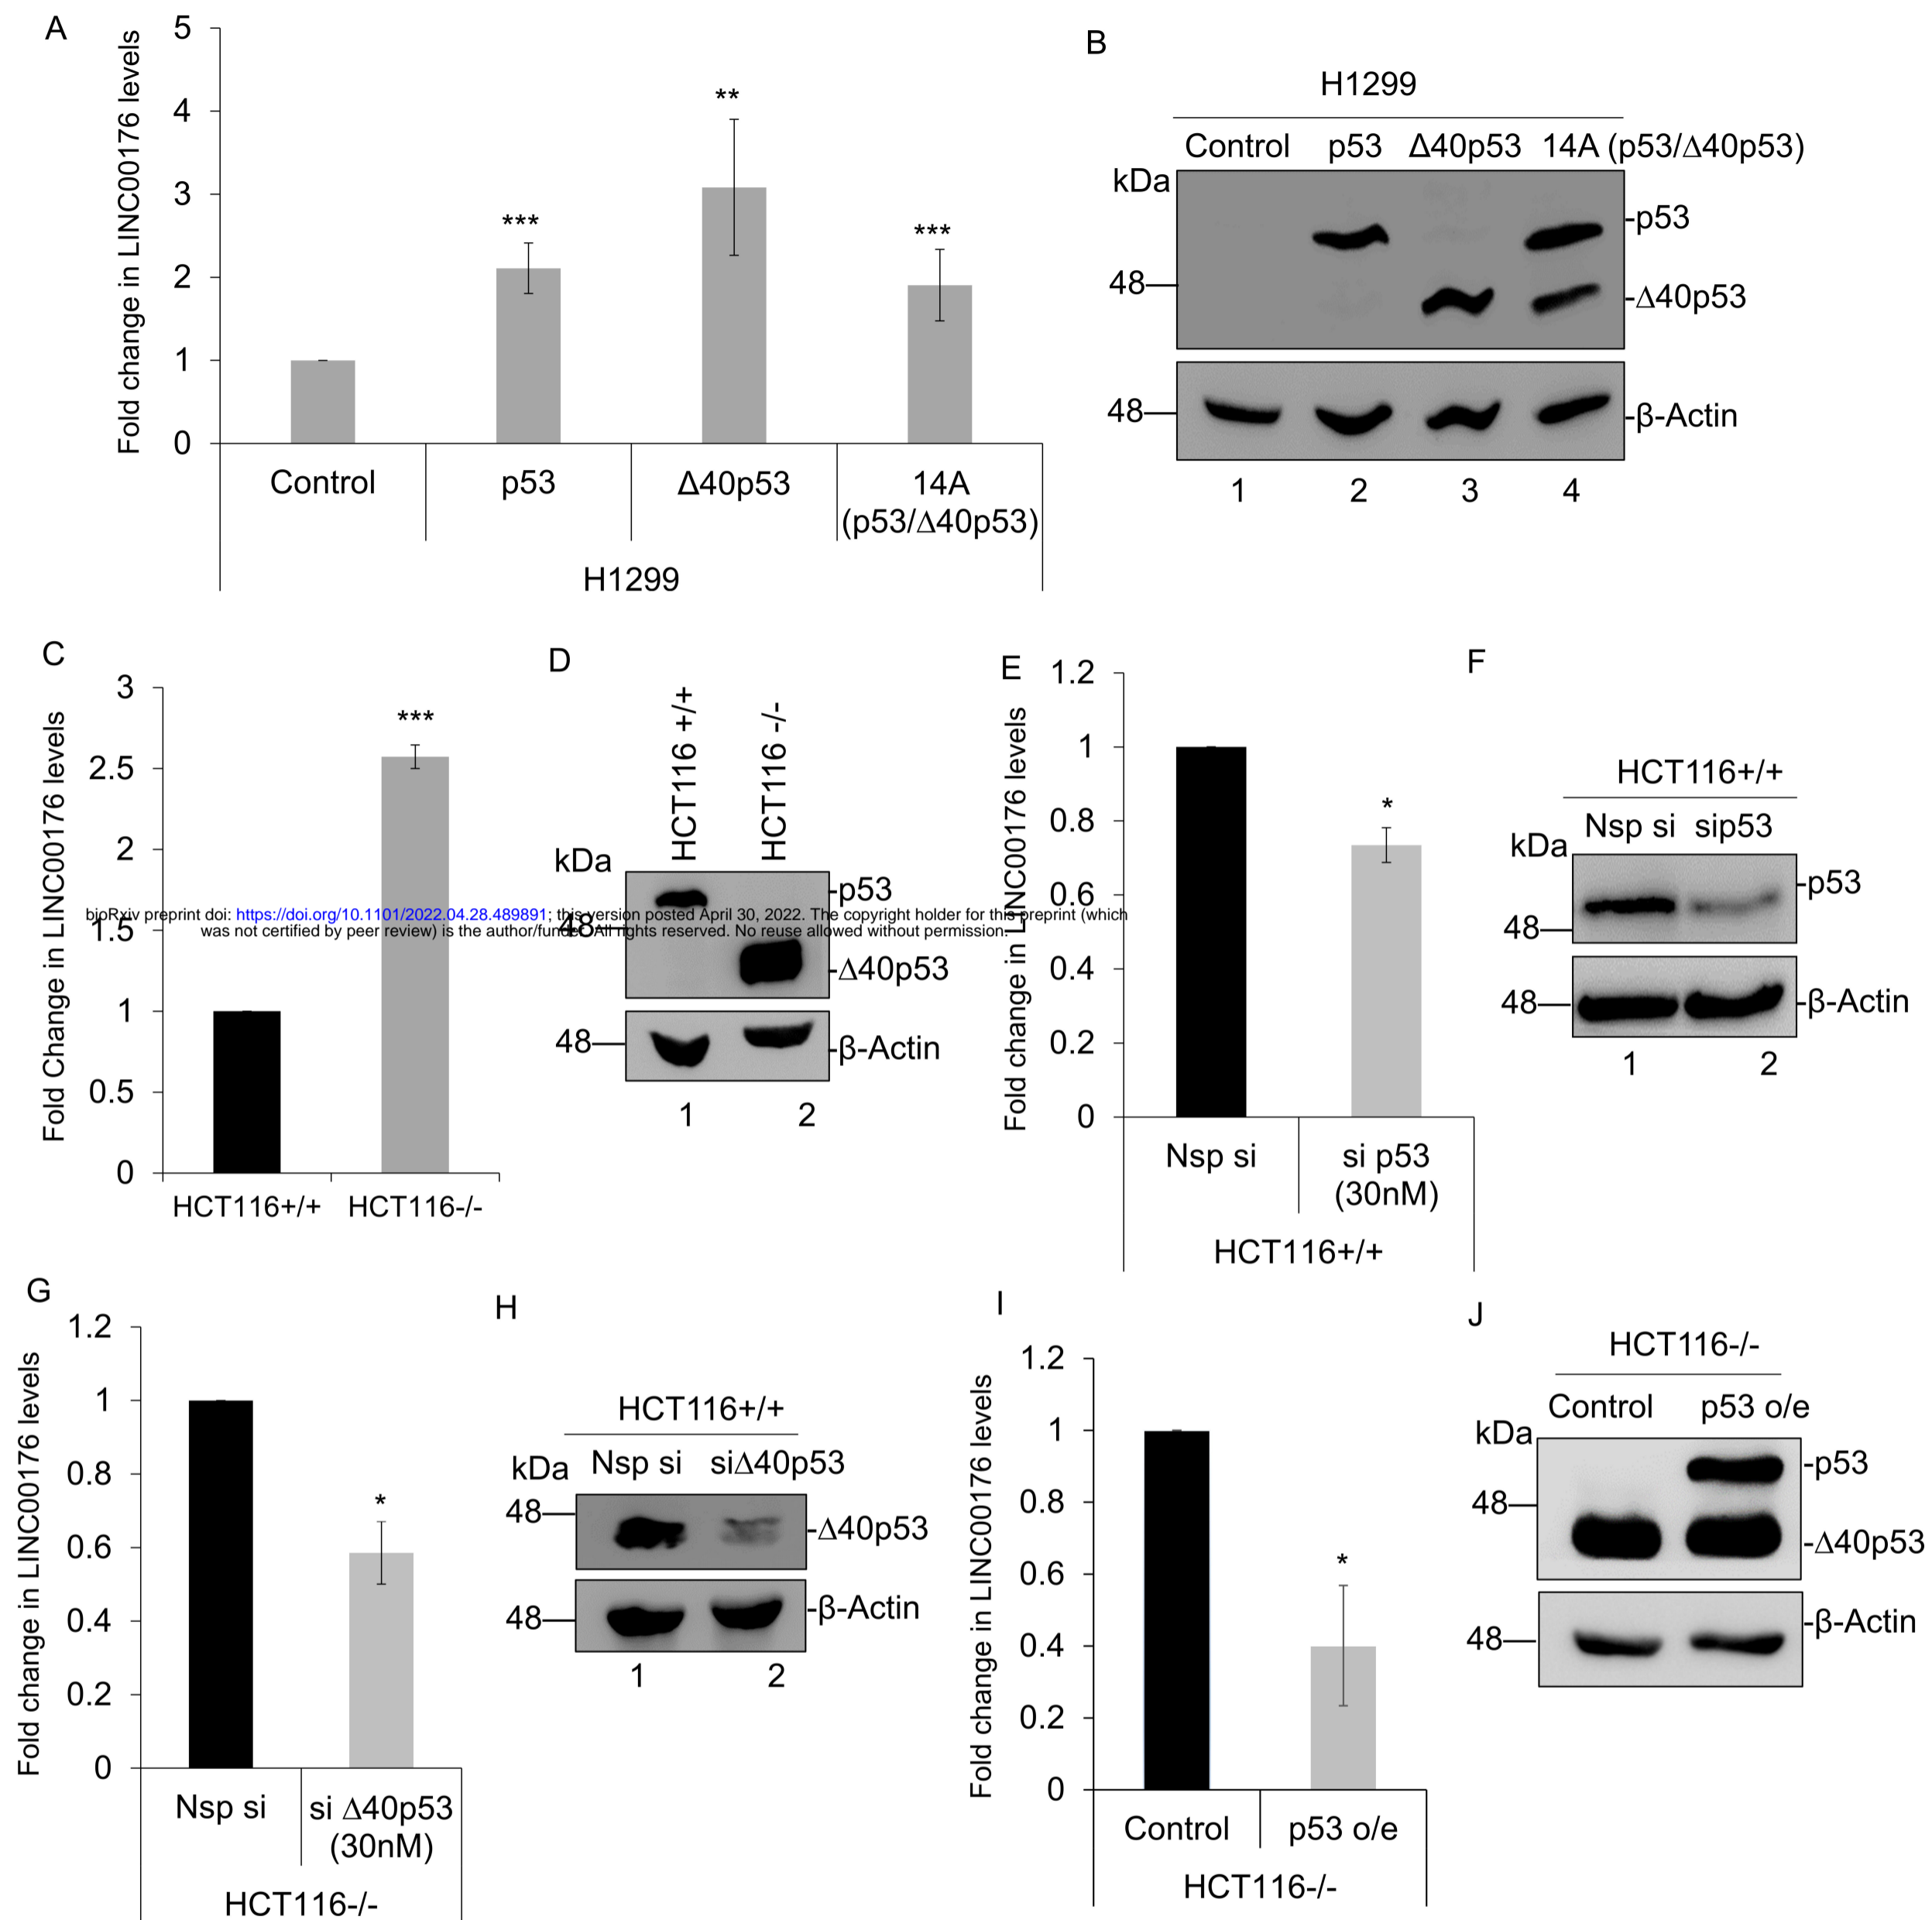

Figure 1. Selection and validation of LINC00176 for further studies

**Figure: 2**

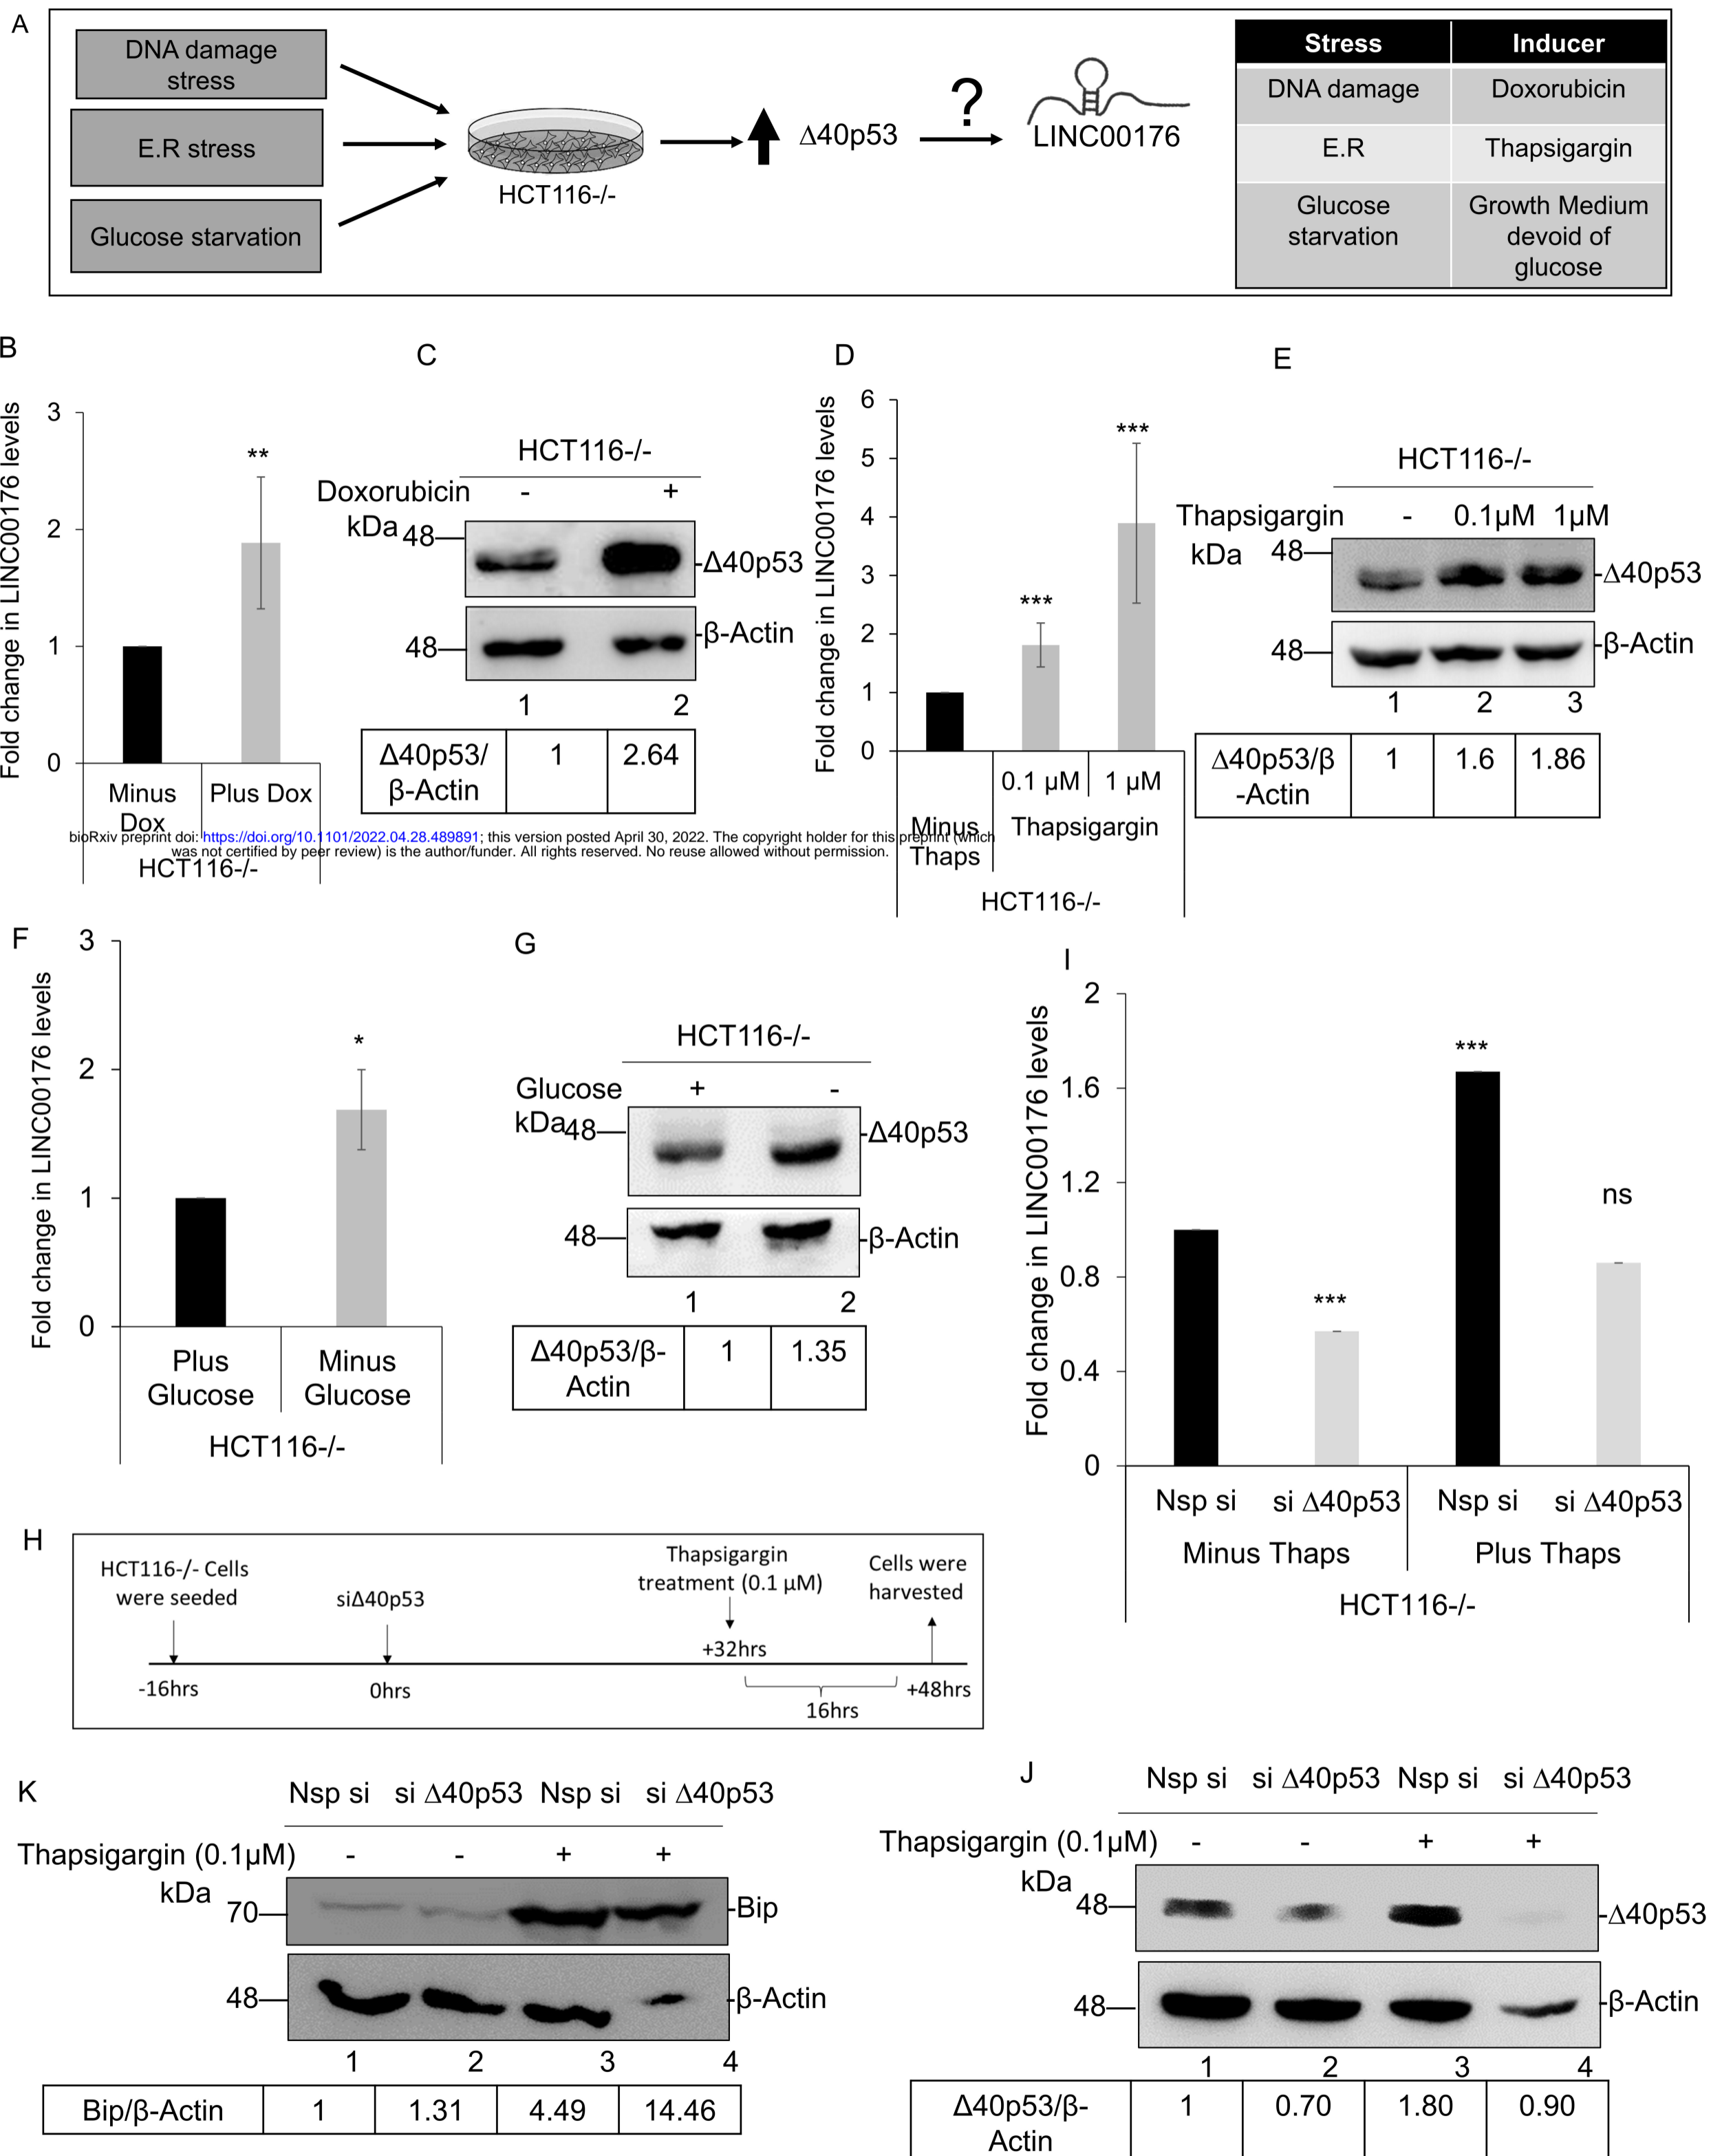

**Figure 2. Regulation of LINC00176 under different stress conditions**

Figure: 3

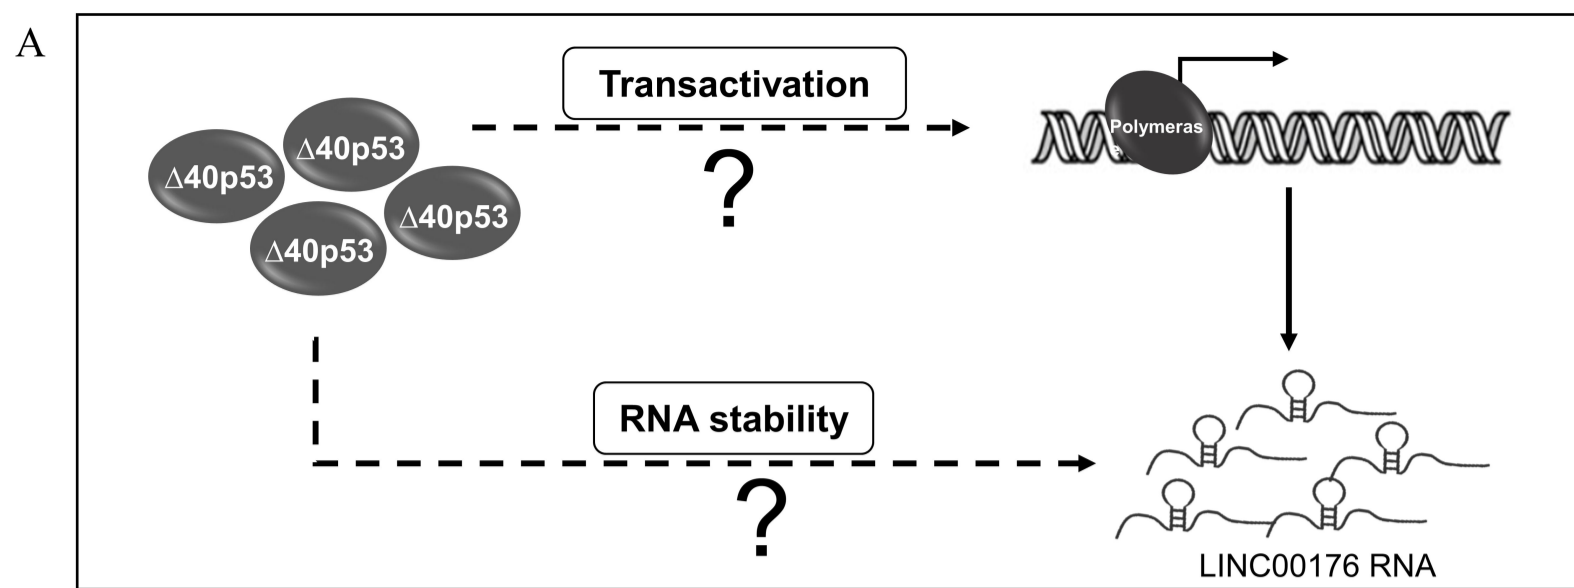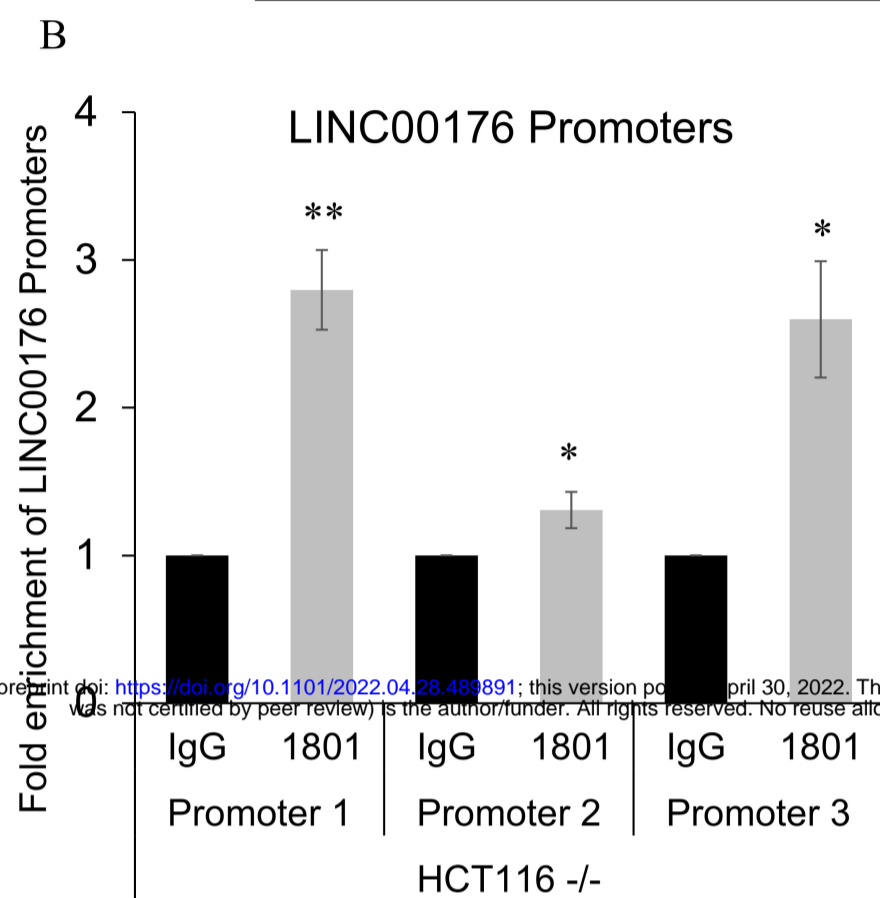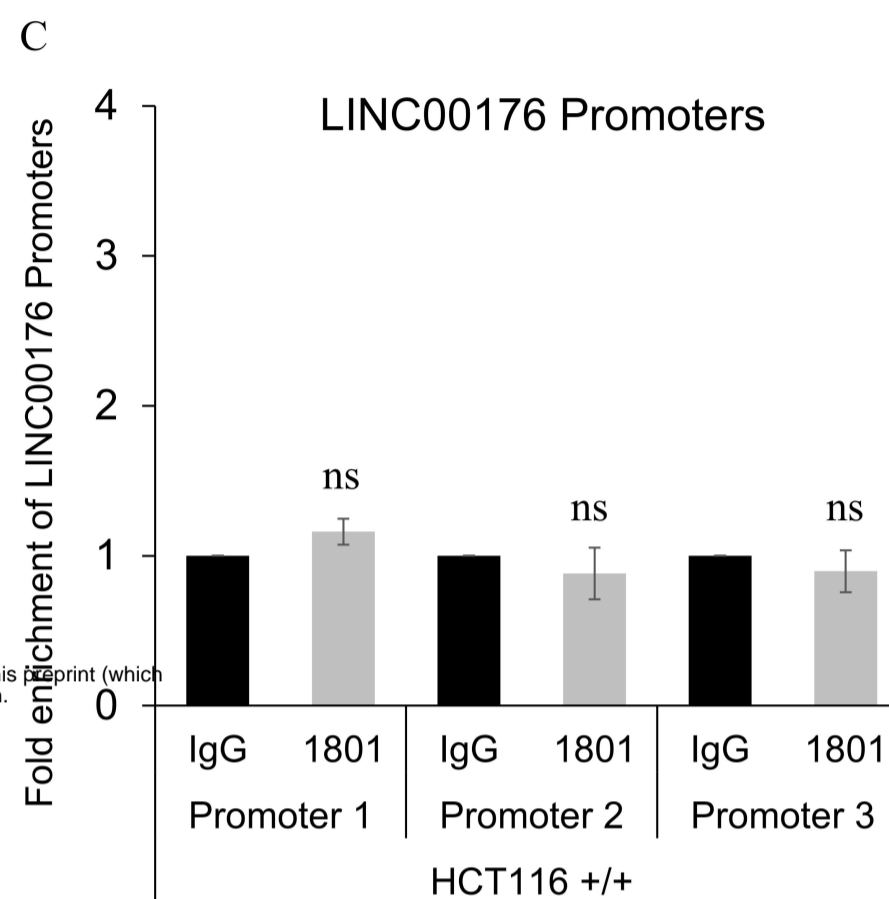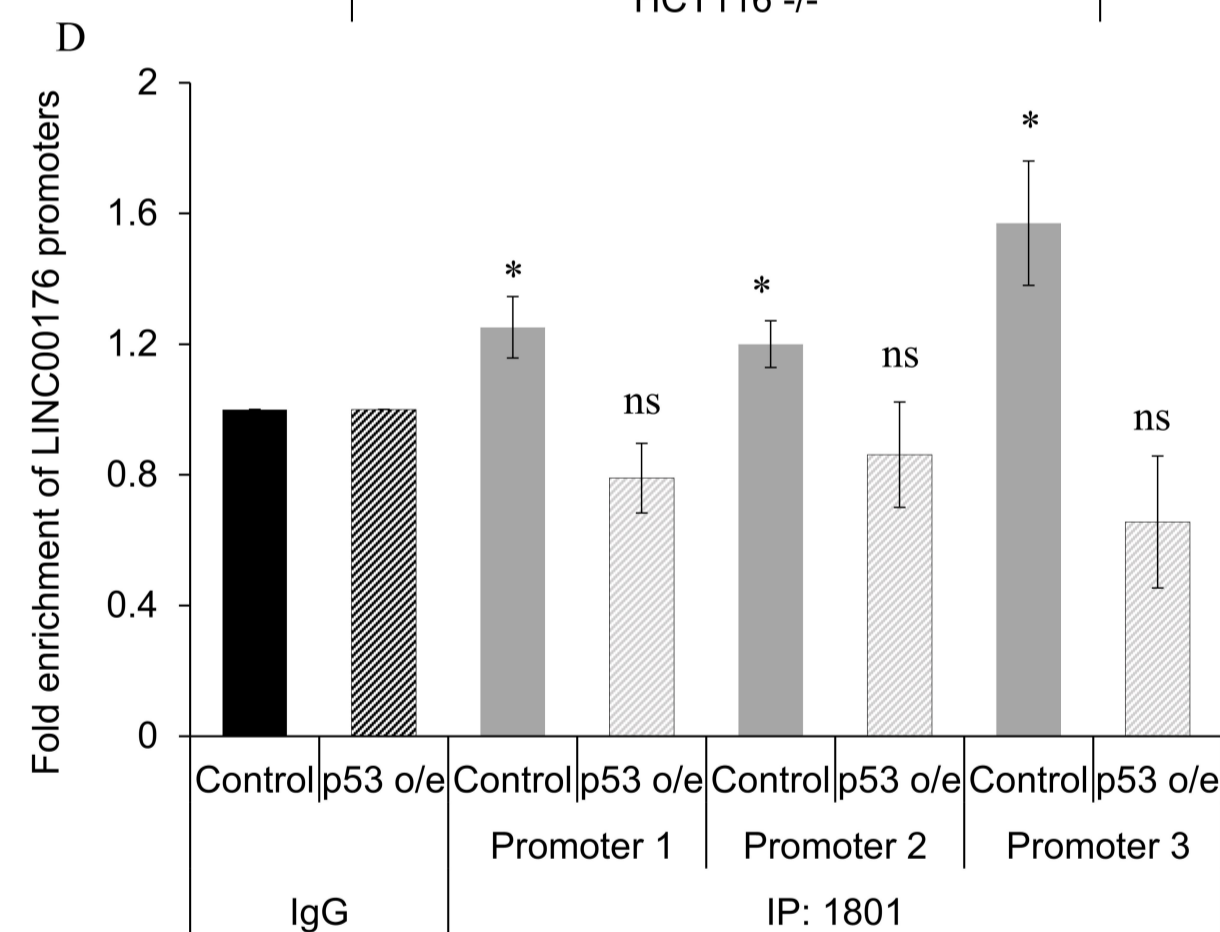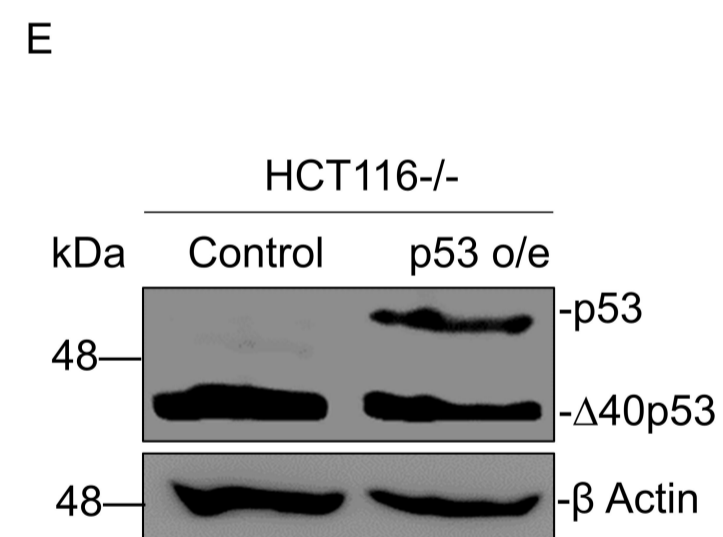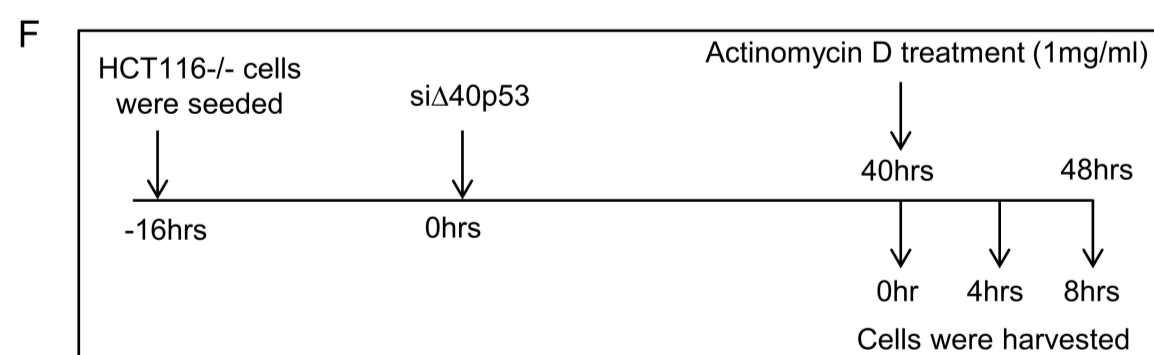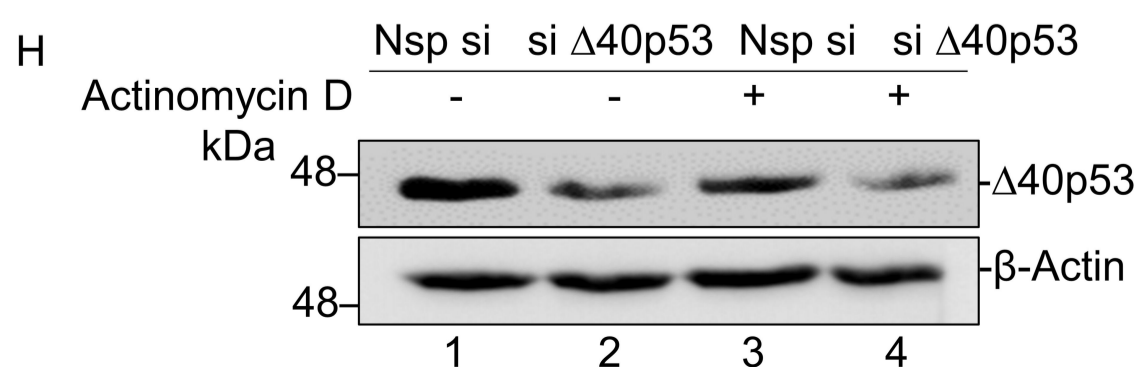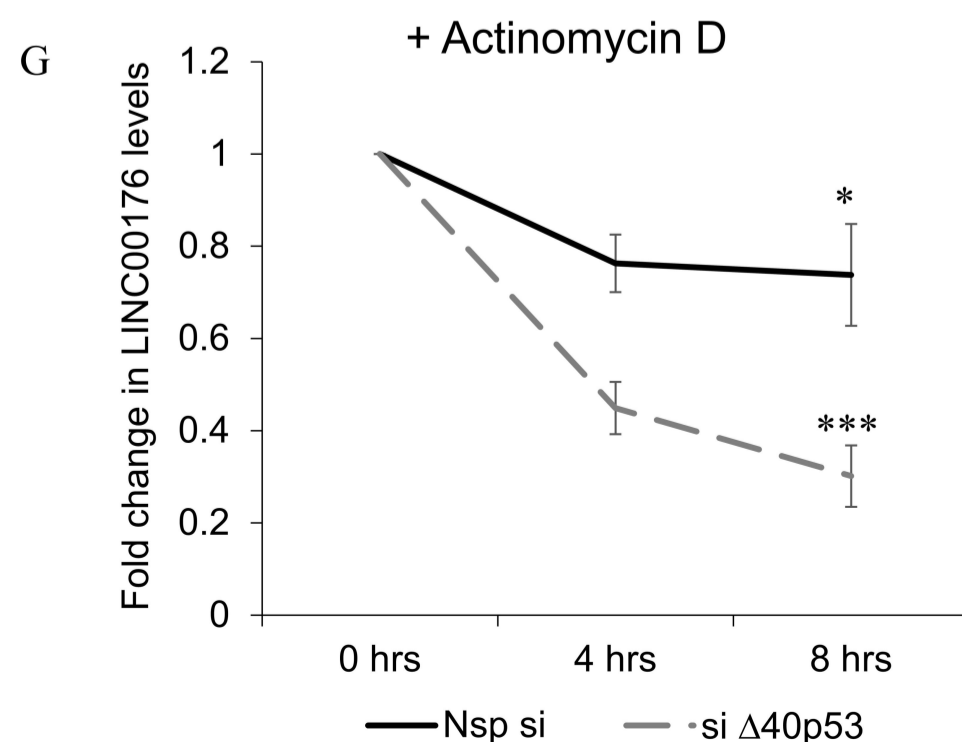

Figure 3. Mechanistic basis of LINC00176 regulation by Δ40p53/p53



Figure: 4

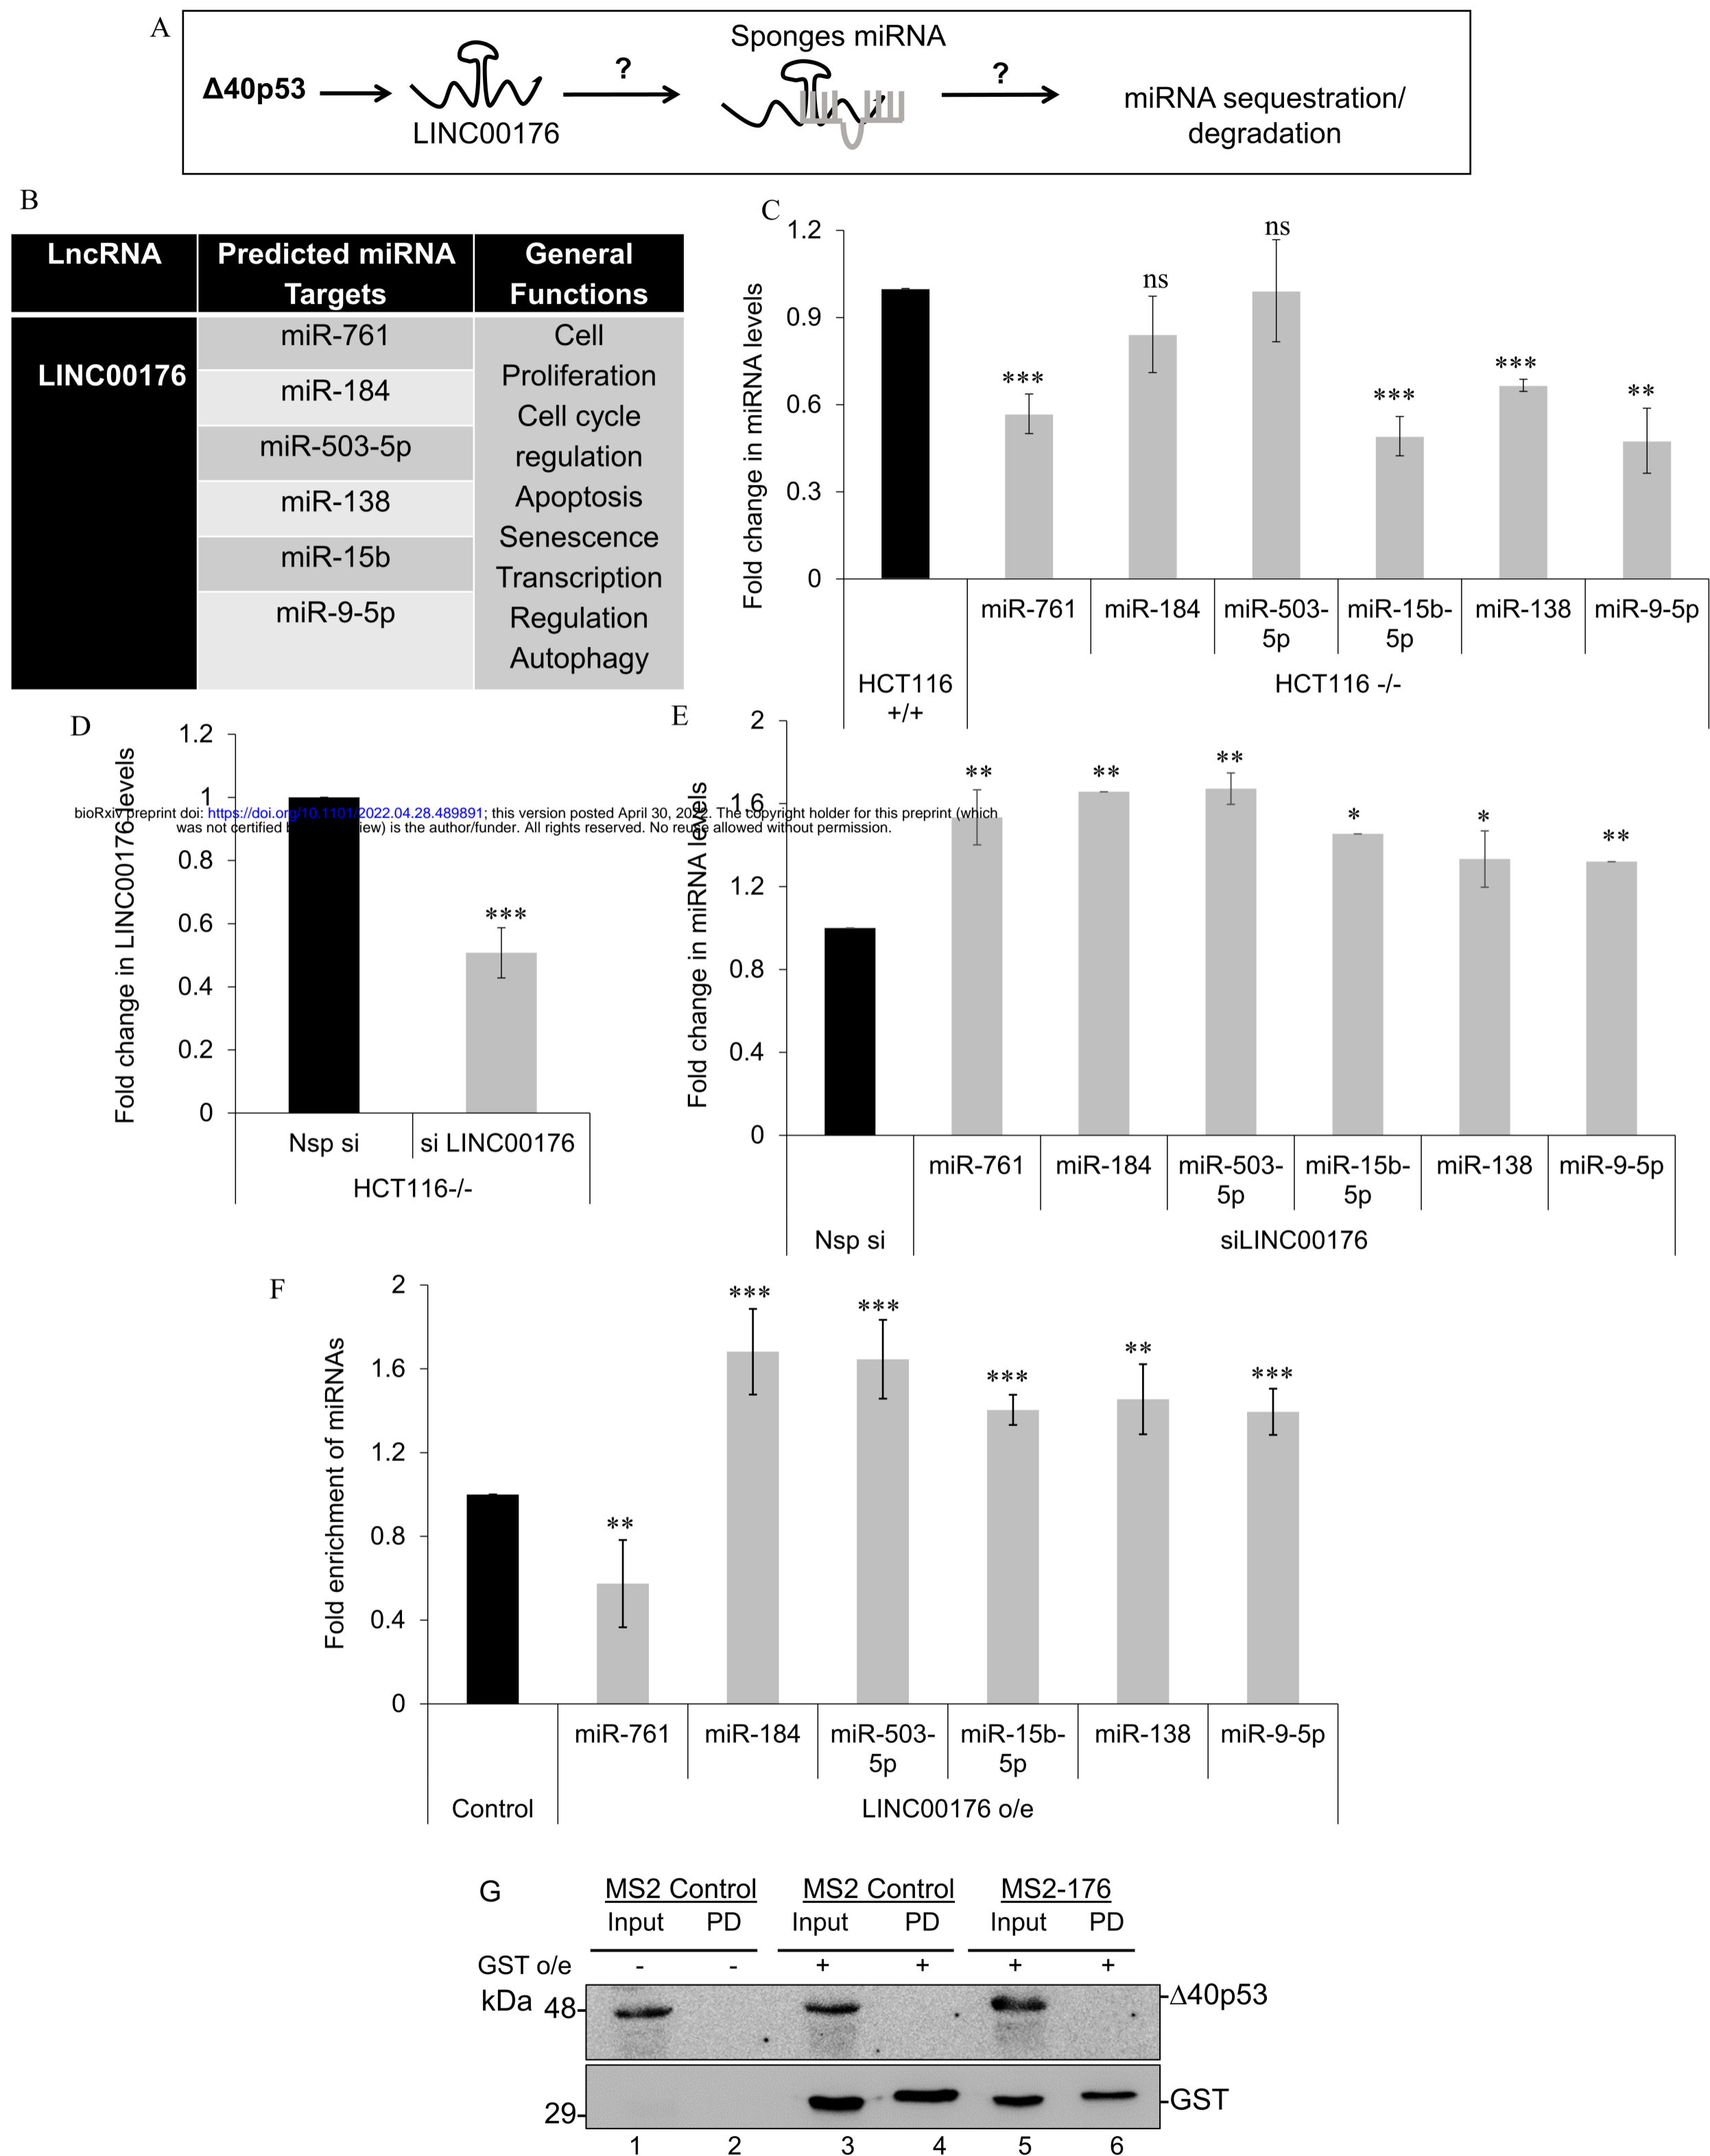

Figure 4. Deciphering the mechanism of action of LINC00176

Figure: 5

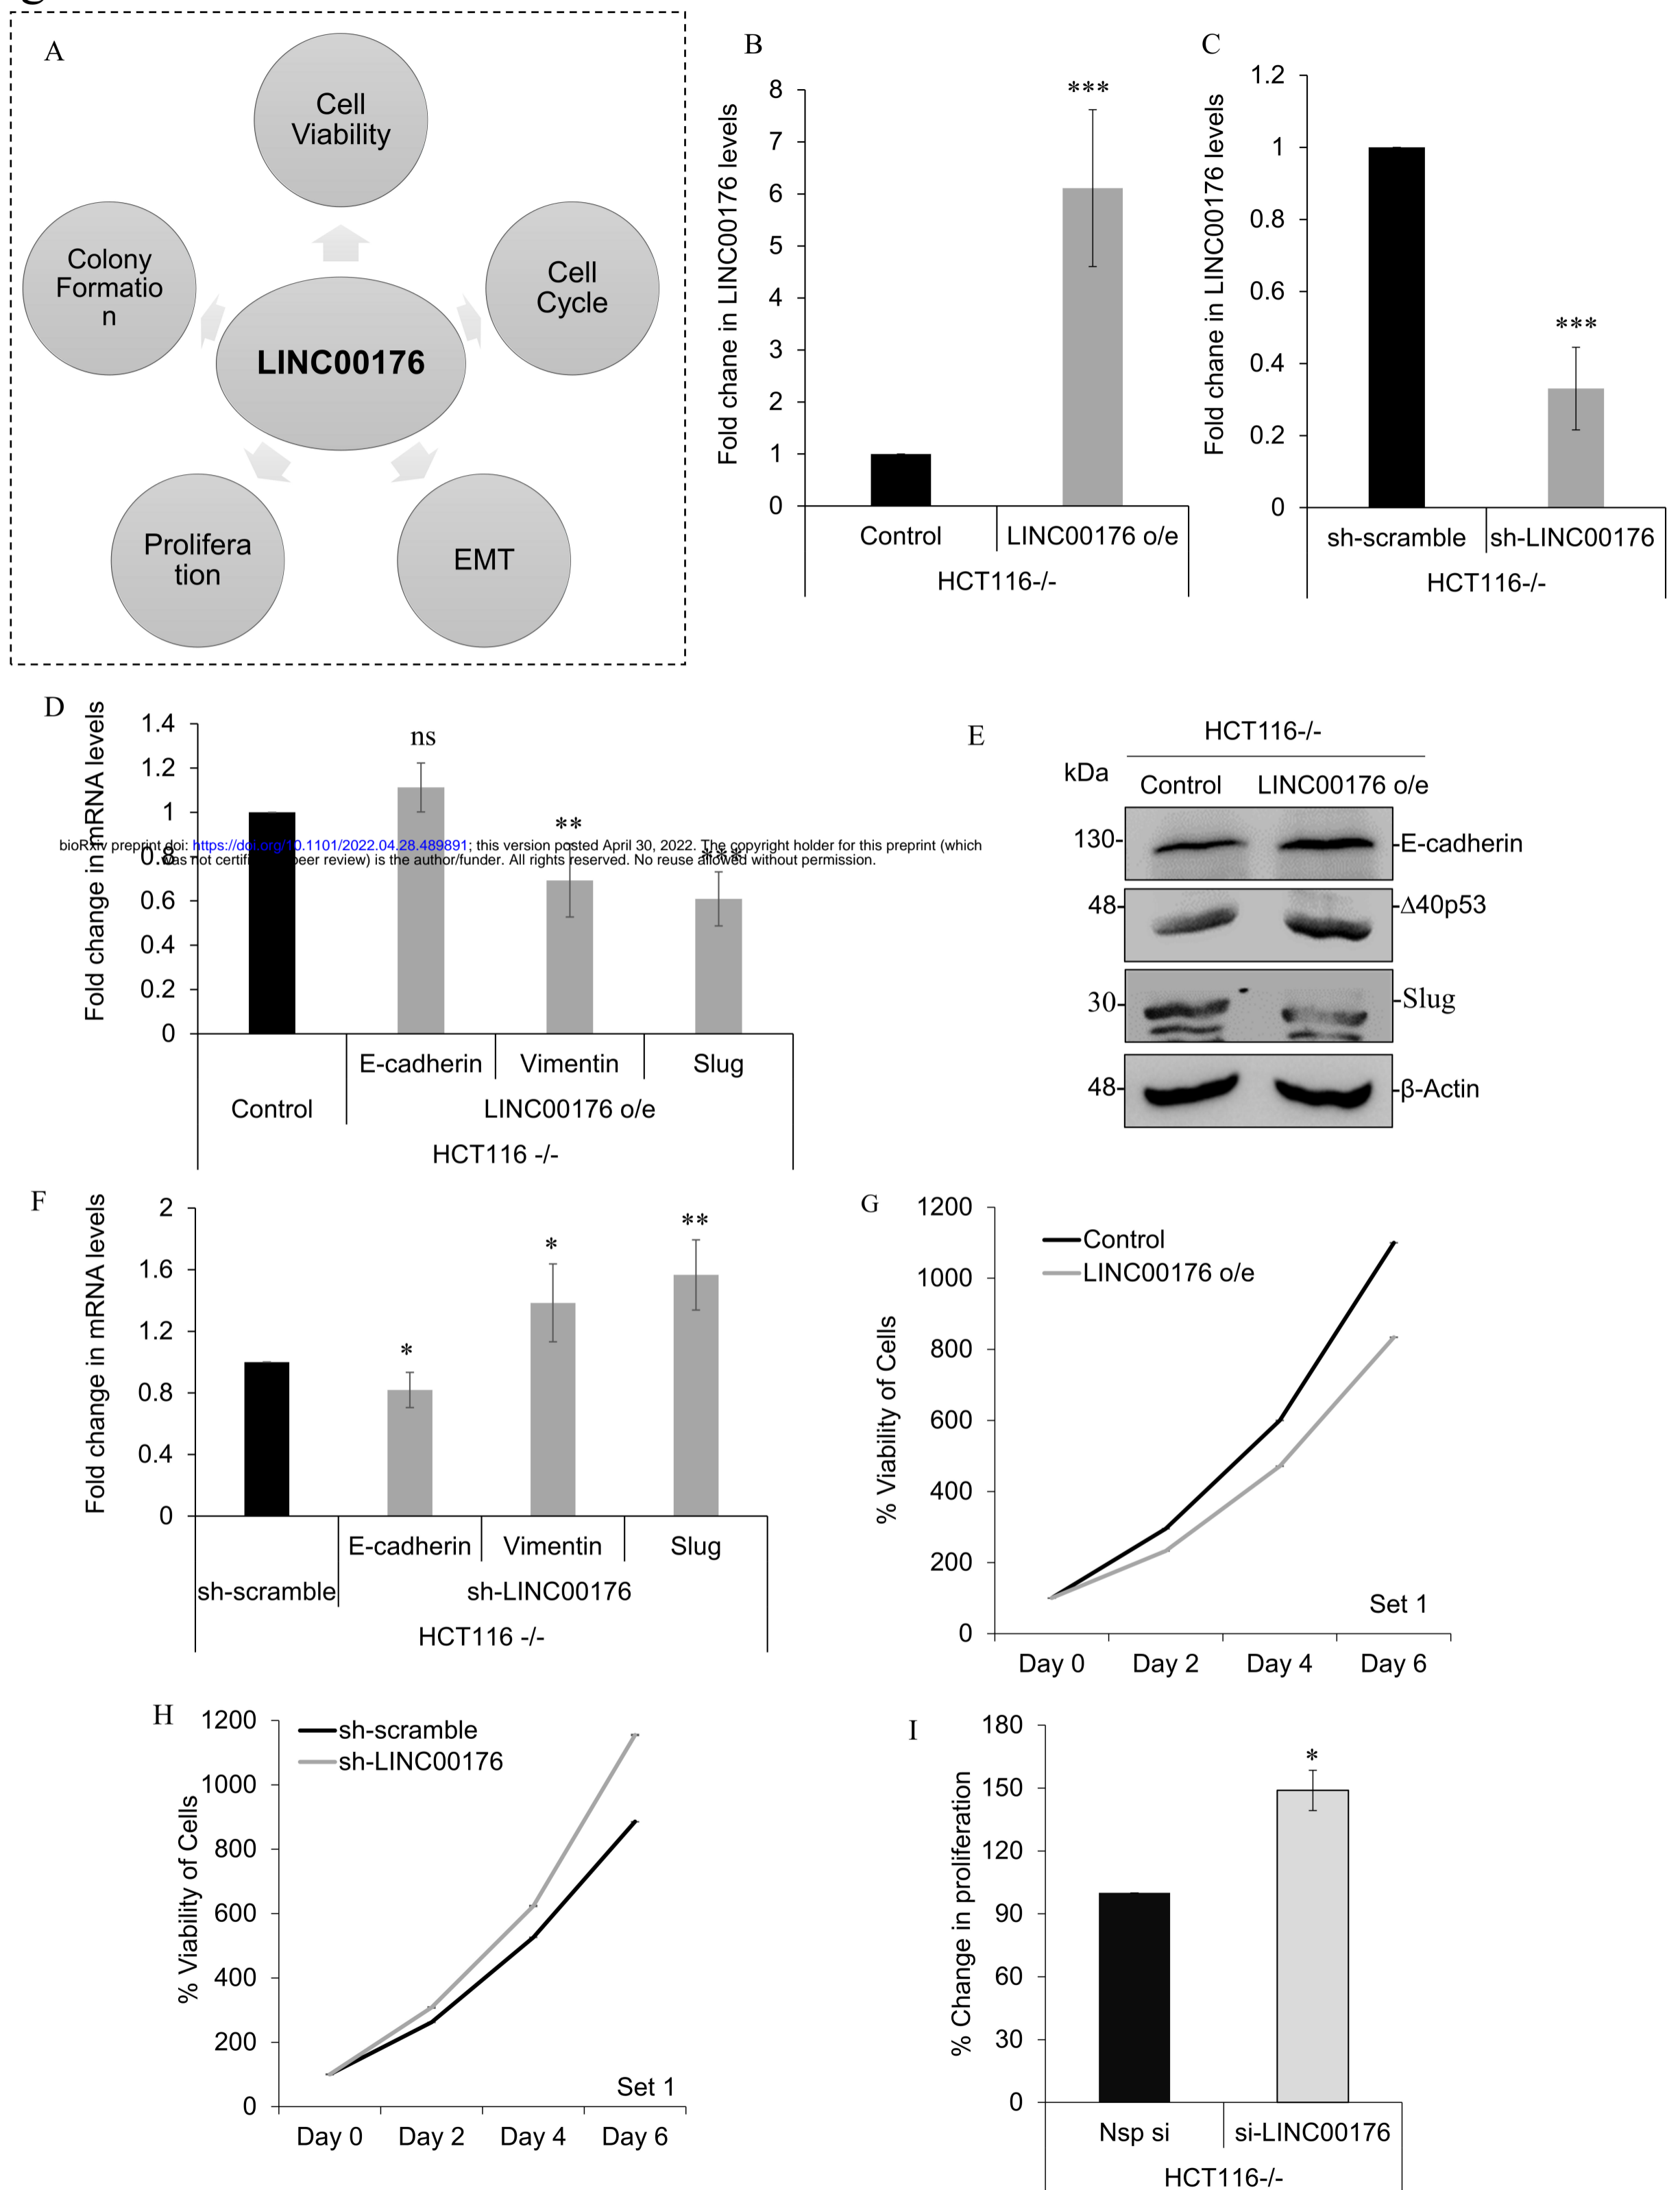

Figure 5: The impact of  $\Delta 40p53$ -LINC00176 axis on cellular processes

# Graphical Abstract

## A. $\Delta 40p53$ Absent

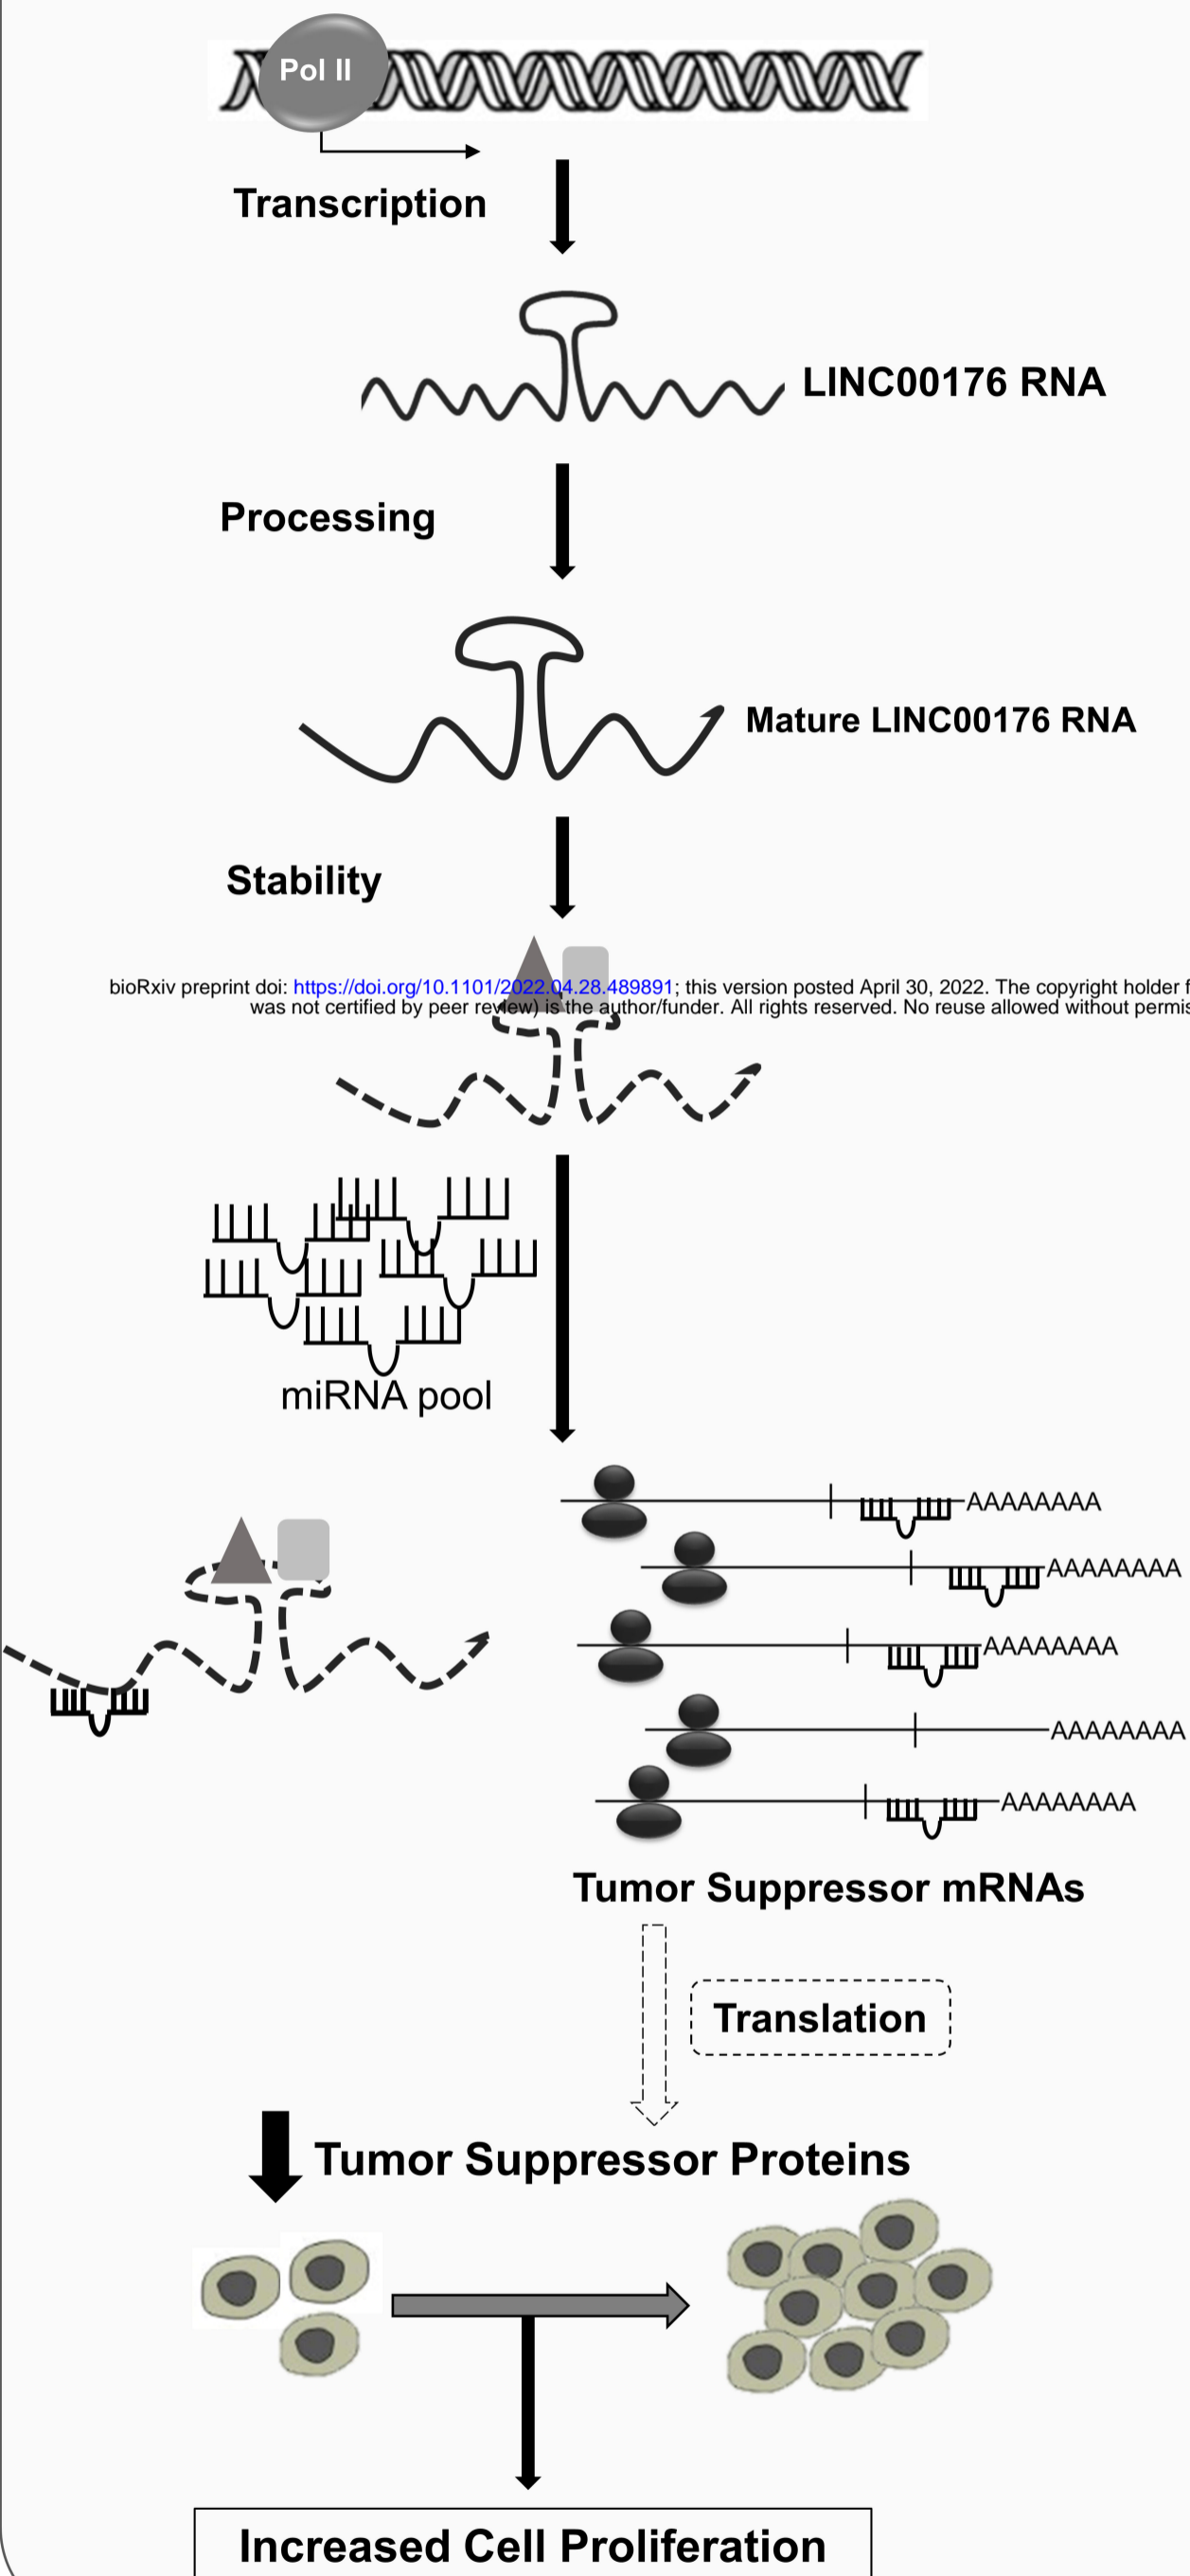

## B. $\Delta 40p53$ Present

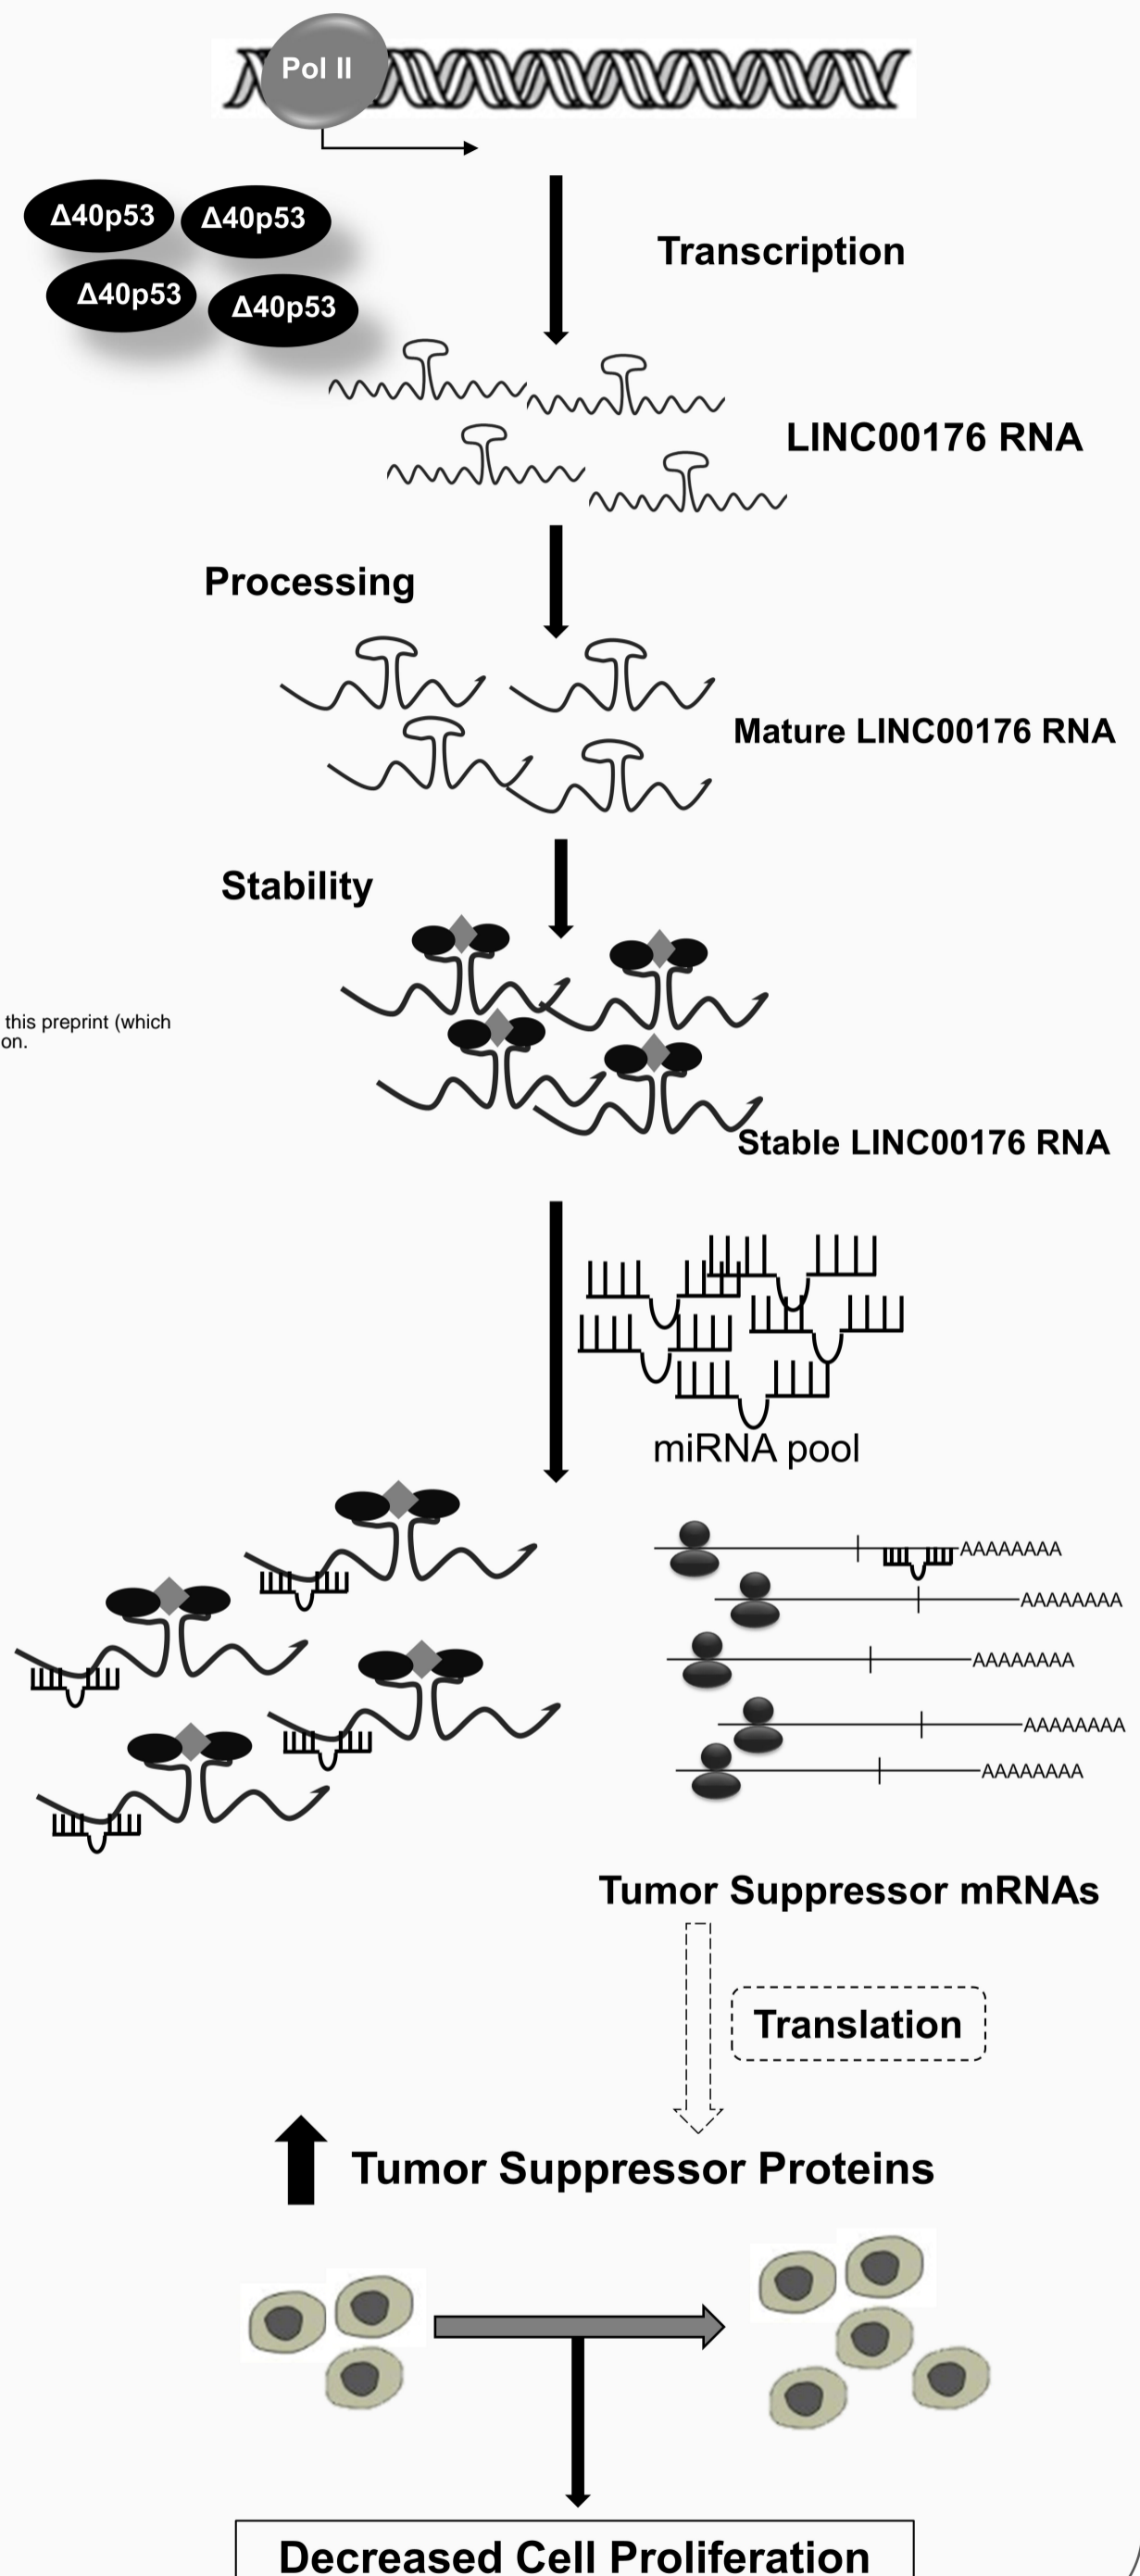

Graphical Abstract: Model depicting the regulation of  $\Delta 40p53$ -LINC00176-miRNA axis
